# Supplementary material
Source: publisher figshare collection journal article supplement (https://acs.figshare.com/ndownloader/files/4681498)
Supplement: Supplementary file 1 [file 4681498]

  
data_SrMg1.532In2.468 
  
_audit_creation_method            SHELXL-97 
_chemical_name_systematic 
; 
 ? 
; 
_chemical_name_common             ? 
_chemical_melting_point           ? 
_chemical_formula_moiety          ? 
_chemical_formula_sum 
 'In2.46 Mg1.53 Sr' 
_chemical_formula_weight          407.97 
  
loop_ 
 _atom_type_symbol 
 _atom_type_description 
 _atom_type_scat_dispersion_real 
 _atom_type_scat_dispersion_imag 
 _atom_type_scat_source 
 'Mg'  'Mg'   0.0486   0.0363 
 'International Tables Vol C Tables 4.2.6.8 and 6.1.1.4' 
 'Sr'  'Sr'  -1.5307   3.2498 
 'International Tables Vol C Tables 4.2.6.8 and 6.1.1.4' 
 'In'  'In'  -0.7276   1.3100 
 'International Tables Vol C Tables 4.2.6.8 and 6.1.1.4' 
  
_symmetry_cell_setting            Tetragonal 
_symmetry_space_group_name_H-M    I4/mmm 
  
loop_ 
 _symmetry_equiv_pos_as_xyz 
 'x, y, z' 
 '-x, -y, z' 
 '-y, x, z' 
 'y, -x, z' 
 '-x, y, -z' 
 'x, -y, -z' 
 'y, x, -z' 
 '-y, -x, -z' 
 'x+1/2, y+1/2, z+1/2' 
 '-x+1/2, -y+1/2, z+1/2' 
 '-y+1/2, x+1/2, z+1/2' 
 'y+1/2, -x+1/2, z+1/2' 
 '-x+1/2, y+1/2, -z+1/2' 
 'x+1/2, -y+1/2, -z+1/2' 
 'y+1/2, x+1/2, -z+1/2' 
 '-y+1/2, -x+1/2, -z+1/2' 
 '-x, -y, -z' 
 'x, y, -z' 
 'y, -x, -z' 
 '-y, x, -z' 
 'x, -y, z' 
 '-x, y, z' 
 '-y, -x, z' 
 'y, x, z' 
 '-x+1/2, -y+1/2, -z+1/2' 
 'x+1/2, y+1/2, -z+1/2' 
 'y+1/2, -x+1/2, -z+1/2' 
 '-y+1/2, x+1/2, -z+1/2' 
 'x+1/2, -y+1/2, z+1/2' 
 '-x+1/2, y+1/2, z+1/2' 
 '-y+1/2, -x+1/2, z+1/2' 
 'y+1/2, x+1/2, z+1/2' 
  
_cell_length_a                    4.6814(3) 
_cell_length_b                    4.6814(3) 
_cell_length_c                    12.7111(15) 
_cell_angle_alpha                 90.00 
_cell_angle_beta                  90.00 
_cell_angle_gamma                 90.00 
_cell_volume                      278.57(4) 
_cell_formula_units_Z             2 
_cell_measurement_temperature     293(2) 
_cell_measurement_reflns_used     1039 
_cell_measurement_theta_min       3.21 
_cell_measurement_theta_max       27.99 
  
_exptl_crystal_description        irregular 
_exptl_crystal_colour             silver
_exptl_crystal_size_max           0.17 
_exptl_crystal_size_mid           0.13
_exptl_crystal_size_min           0.11 
_exptl_crystal_density_meas       'not measured' 
_exptl_crystal_density_diffrn     4.864 
_exptl_crystal_density_method     'not measured' 
_exptl_crystal_F_000              354 
_exptl_absorpt_coefficient_mu     19.623 
_exptl_absorpt_correction_type    empirical 
_exptl_absorpt_correction_T_min   0.1681 
_exptl_absorpt_correction_T_max   0.3176 
_exptl_absorpt_process_details    ? 
  
_exptl_special_details 
; 
 ? 
; 
  
_diffrn_ambient_temperature       293(2) 
_diffrn_radiation_wavelength      0.71073 
_diffrn_radiation_type            MoK\a 
_diffrn_radiation_source          'fine-focus sealed tube' 
_diffrn_radiation_monochromator   graphite 
_diffrn_measurement_device_type   'CCD area detector' 
_diffrn_measurement_method        'phi and omega scans' 
_diffrn_detector_area_resol_mean  ? 
_diffrn_standards_number          ? 
_diffrn_standards_interval_count  ? 
_diffrn_standards_interval_time   ? 
_diffrn_standards_decay_%         ? 
_diffrn_reflns_number             1219 
_diffrn_reflns_av_R_equivalents   0.0448 
_diffrn_reflns_av_sigmaI/netI     0.0166 
_diffrn_reflns_limit_h_min        -6 
_diffrn_reflns_limit_h_max        6 
_diffrn_reflns_limit_k_min        -6 
_diffrn_reflns_limit_k_max        6 
_diffrn_reflns_limit_l_min        -16 
_diffrn_reflns_limit_l_max        16 
_diffrn_reflns_theta_min          3.21 
_diffrn_reflns_theta_max          28.25 
_reflns_number_total              129 
_reflns_number_gt                 129 
_reflns_threshold_expression      >2sigma(I) 
  
_computing_data_collection        'Bruker SMART' 
_computing_cell_refinement        'Bruker SMART' 
_computing_data_reduction         'Bruker SAINT' 
_computing_structure_solution     'SHELXS-97 (Sheldrick, 1990)' 
_computing_structure_refinement   'SHELXL-97 (Sheldrick, 1997)' 
_computing_molecular_graphics     'Bruker SHELXTL' 
_computing_publication_material   'Bruker SHELXTL' 
  
_refine_special_details 
; 
 Refinement of F^2^ against ALL reflections.  The weighted R-factor wR and 
 goodness of fit S are based on F^2^, conventional R-factors R are based 
 on F, with F set to zero for negative F^2^. The threshold expression of 
 F^2^ > 2sigma(F^2^) is used only for calculating R-factors(gt) etc. and is 
 not relevant to the choice of reflections for refinement.  R-factors based 
 on F^2^ are statistically about twice as large as those based on F, and R- 
 factors based on ALL data will be even larger. 
; 
  
_refine_ls_structure_factor_coef  Fsqd 
_refine_ls_matrix_type            full 
_refine_ls_weighting_scheme       calc 
_refine_ls_weighting_details 
 'calc w=1/[\s^2^(Fo^2^)+(0.0150P)^2^+1.0000P] where P=(Fo^2^+2Fc^2^)/3' 
_atom_sites_solution_primary      direct 
_atom_sites_solution_secondary    difmap 
_atom_sites_solution_hydrogens    '.' 
_refine_ls_hydrogen_treatment     '.' 
_refine_ls_extinction_method      SHELXL 
_refine_ls_extinction_coef        0.0266(15) 
_refine_ls_extinction_expression 
 'Fc^*^=kFc[1+0.001xFc^2^\l^3^/sin(2\q)]^-1/4^' 
_refine_ls_number_reflns          129 
_refine_ls_number_parameters      10 
_refine_ls_number_restraints      0 
_refine_ls_R_factor_all           0.0131 
_refine_ls_R_factor_gt            0.0131 
_refine_ls_wR_factor_ref          0.0296 
_refine_ls_wR_factor_gt           0.0296 
_refine_ls_goodness_of_fit_ref    0.998 
_refine_ls_restrained_S_all       0.998 
_refine_ls_shift/su_max           0.001 
_refine_ls_shift/su_mean          0.000 
  
loop_ 
 _atom_site_label 
 _atom_site_type_symbol 
 _atom_site_fract_x 
 _atom_site_fract_y 
 _atom_site_fract_z 
 _atom_site_U_iso_or_equiv 
 _atom_site_adp_type 
 _atom_site_occupancy 
 _atom_site_symmetry_multiplicity 
 _atom_site_calc_flag 
 _atom_site_refinement_flags 
 _atom_site_disorder_assembly 
 _atom_site_disorder_group 
Sr Sr 0.0000 0.0000 0.0000 0.0168(2) Uani 1 16 d S . . 
In1 In 0.0000 0.0000 0.61046(3) 0.0163(2) Uani 1 8 d S . . 
In2 In 0.0000 0.5000 0.2500 0.0165(4) Uani 0.234(2) 8 d SP . . 
Mg2 Mg 0.0000 0.5000 0.2500 0.0165(4) Uani 0.766(2) 8 d SP . . 
  
loop_ 
 _atom_site_aniso_label 
 _atom_site_aniso_U_11 
 _atom_site_aniso_U_22 
 _atom_site_aniso_U_33 
 _atom_site_aniso_U_23 
 _atom_site_aniso_U_13 
 _atom_site_aniso_U_12 
Sr 0.0152(3) 0.0152(3) 0.0201(4) 0.000 0.000 0.000 
In1 0.0184(2) 0.0184(2) 0.0121(3) 0.000 0.000 0.000 
In2 0.0165(4) 0.0165(4) 0.0165(5) 0.000 0.000 0.000 
Mg2 0.0165(4) 0.0165(4) 0.0165(5) 0.000 0.000 0.000 
  
_geom_special_details 
; 
 All esds (except the esd in the dihedral angle between two l.s. planes) 
 are estimated using the full covariance matrix.  The cell esds are taken 
 into account individually in the estimation of esds in distances, angles 
 and torsion angles; correlations between esds in cell parameters are only 
 used when they are defined by crystal symmetry.  An approximate (isotropic) 
 treatment of cell esds is used for estimating esds involving l.s. planes. 
; 
  
loop_ 
 _geom_bond_atom_site_label_1 
 _geom_bond_atom_site_label_2 
 _geom_bond_distance 
 _geom_bond_site_symmetry_2 
 _geom_bond_publ_flag 
Sr In1 3.5957(2) 25_445 ? 
Sr In1 3.5957(2) 9_554 ? 
Sr In1 3.5957(2) 25 ? 
Sr In1 3.5957(2) 9_444 ? 
Sr In1 3.5957(2) 25_455 ? 
Sr In1 3.5957(2) 25_545 ? 
Sr In1 3.5957(2) 9_454 ? 
Sr In1 3.5957(2) 9_544 ? 
Sr Mg2 3.9468(3) 25 ? 
Sr Mg2 3.9468(3) 17 ? 
Sr In2 3.9468(3) . ? 
In1 In1 2.8080(8) 17_556 ? 
In1 Mg2 2.9369(3) 17_566 ? 
In1 Mg2 2.9369(3) 9_545 ? 
In1 In2 2.9369(3) 17_566 ? 
In1 In2 2.9369(3) 9_545 ? 
In1 Mg2 2.9369(3) 17_556 ? 
In1 In2 2.9369(3) 9_445 ? 
In1 Mg2 2.9369(3) 9_445 ? 
In1 In2 2.9369(3) 17_556 ? 
In1 Sr 3.5957(2) 9_445 ? 
In1 Sr 3.5957(2) 9 ? 
In1 Sr 3.5957(2) 9_545 ? 
In2 In1 2.9369(3) 17_566 ? 
In2 In1 2.9369(3) 9_454 ? 
In2 In1 2.9369(3) 17_556 ? 
In2 In1 2.9369(3) 9_554 ? 
In2 Mg2 3.3102(2) 25_565 ? 
In2 Mg2 3.3102(2) 25_455 ? 
In2 In2 3.3102(2) 25_565 ? 
In2 In2 3.3102(2) 25_455 ? 
In2 Mg2 3.3102(2) 25_465 ? 
In2 Mg2 3.3102(2) 25 ? 
In2 In2 3.3102(2) 25 ? 
In2 In2 3.3102(2) 25_465 ? 
  
loop_ 
 _geom_angle_atom_site_label_1 
 _geom_angle_atom_site_label_2 
 _geom_angle_atom_site_label_3 
 _geom_angle 
 _geom_angle_site_symmetry_1 
 _geom_angle_site_symmetry_3 
 _geom_angle_publ_flag 
In1 Sr In1 180.000(10) 25_445 9_554 ? 
In1 Sr In1 134.032(12) 25_445 25 ? 
In1 Sr In1 45.968(12) 9_554 25 ? 
In1 Sr In1 45.968(12) 25_445 9_444 ? 
In1 Sr In1 134.032(12) 9_554 9_444 ? 
In1 Sr In1 180.000(10) 25 9_444 ? 
In1 Sr In1 81.230(4) 25_445 25_455 ? 
In1 Sr In1 98.770(4) 9_554 25_455 ? 
In1 Sr In1 81.230(4) 25 25_455 ? 
In1 Sr In1 98.770(4) 9_444 25_455 ? 
In1 Sr In1 81.230(4) 25_445 25_545 ? 
In1 Sr In1 98.770(4) 9_554 25_545 ? 
In1 Sr In1 81.230(4) 25 25_545 ? 
In1 Sr In1 98.770(4) 9_444 25_545 ? 
In1 Sr In1 134.032(12) 25_455 25_545 ? 
In1 Sr In1 98.770(4) 25_445 9_454 ? 
In1 Sr In1 81.230(4) 9_554 9_454 ? 
In1 Sr In1 98.770(4) 25 9_454 ? 
In1 Sr In1 81.230(4) 9_444 9_454 ? 
In1 Sr In1 45.968(12) 25_455 9_454 ? 
In1 Sr In1 180.000(10) 25_545 9_454 ? 
In1 Sr In1 98.770(4) 25_445 9_544 ? 
In1 Sr In1 81.230(4) 9_554 9_544 ? 
In1 Sr In1 98.770(4) 25 9_544 ? 
In1 Sr In1 81.230(4) 9_444 9_544 ? 
In1 Sr In1 180.000(10) 25_455 9_544 ? 
In1 Sr In1 45.968(12) 25_545 9_544 ? 
In1 Sr In1 134.032(12) 9_454 9_544 ? 
In1 Sr Mg2 134.464(4) 25_445 25 ? 
In1 Sr Mg2 45.536(4) 9_554 25 ? 
In1 Sr Mg2 85.890(7) 25 25 ? 
In1 Sr Mg2 94.110(7) 9_444 25 ? 
In1 Sr Mg2 134.464(4) 25_455 25 ? 
In1 Sr Mg2 85.890(7) 25_545 25 ? 
In1 Sr Mg2 94.110(7) 9_454 25 ? 
In1 Sr Mg2 45.536(4) 9_544 25 ? 
In1 Sr Mg2 45.536(4) 25_445 17 ? 
In1 Sr Mg2 134.464(4) 9_554 17 ? 
In1 Sr Mg2 94.110(7) 25 17 ? 
In1 Sr Mg2 85.890(7) 9_444 17 ? 
In1 Sr Mg2 94.110(7) 25_455 17 ? 
In1 Sr Mg2 45.536(4) 25_545 17 ? 
In1 Sr Mg2 134.464(4) 9_454 17 ? 
In1 Sr Mg2 85.890(7) 9_544 17 ? 
Mg2 Sr Mg2 130.412(4) 25 17 ? 
In1 Sr In2 134.464(4) 25_445 . ? 
In1 Sr In2 45.536(4) 9_554 . ? 
In1 Sr In2 85.890(7) 25 . ? 
In1 Sr In2 94.110(7) 9_444 . ? 
In1 Sr In2 85.890(7) 25_455 . ? 
In1 Sr In2 134.464(4) 25_545 . ? 
In1 Sr In2 45.536(4) 9_454 . ? 
In1 Sr In2 94.110(7) 9_544 . ? 
Mg2 Sr In2 49.588(5) 25 . ? 
Mg2 Sr In2 180.0 17 . ? 
In1 In1 Mg2 127.154(7) 17_556 17_566 ? 
In1 In1 Mg2 127.154(7) 17_556 9_545 ? 
Mg2 In1 Mg2 68.606(7) 17_566 9_545 ? 
In1 In1 In2 127.154(7) 17_556 17_566 ? 
Mg2 In1 In2 0.0 17_566 17_566 ? 
Mg2 In1 In2 68.606(7) 9_545 17_566 ? 
In1 In1 In2 127.154(7) 17_556 9_545 ? 
Mg2 In1 In2 68.606(7) 17_566 9_545 ? 
Mg2 In1 In2 0.0 9_545 9_545 ? 
In2 In1 In2 68.606(7) 17_566 9_545 ? 
In1 In1 Mg2 127.154(7) 17_556 17_556 ? 
Mg2 In1 Mg2 105.691(13) 17_566 17_556 ? 
Mg2 In1 Mg2 68.606(7) 9_545 17_556 ? 
In2 In1 Mg2 105.691(13) 17_566 17_556 ? 
In2 In1 Mg2 68.606(7) 9_545 17_556 ? 
In1 In1 In2 127.154(7) 17_556 9_445 ? 
Mg2 In1 In2 68.606(7) 17_566 9_445 ? 
Mg2 In1 In2 105.691(13) 9_545 9_445 ? 
In2 In1 In2 68.606(7) 17_566 9_445 ? 
In2 In1 In2 105.691(13) 9_545 9_445 ? 
Mg2 In1 In2 68.606(7) 17_556 9_445 ? 
In1 In1 Mg2 127.154(7) 17_556 9_445 ? 
Mg2 In1 Mg2 68.606(7) 17_566 9_445 ? 
Mg2 In1 Mg2 105.691(13) 9_545 9_445 ? 
In2 In1 Mg2 68.606(7) 17_566 9_445 ? 
In2 In1 Mg2 105.691(13) 9_545 9_445 ? 
Mg2 In1 Mg2 68.606(7) 17_556 9_445 ? 
In2 In1 Mg2 0.0 9_445 9_445 ? 
In1 In1 In2 127.154(7) 17_556 17_556 ? 
Mg2 In1 In2 105.691(13) 17_566 17_556 ? 
Mg2 In1 In2 68.606(7) 9_545 17_556 ? 
In2 In1 In2 105.691(13) 17_566 17_556 ? 
In2 In1 In2 68.606(7) 9_545 17_556 ? 
Mg2 In1 In2 0.0 17_556 17_556 ? 
In2 In1 In2 68.606(7) 9_445 17_556 ? 
Mg2 In1 In2 68.606(7) 9_445 17_556 ? 
In1 In1 Sr 67.016(6) 17_556 9_445 ? 
Mg2 In1 Sr 138.996(3) 17_566 9_445 ? 
Mg2 In1 Sr 138.996(3) 9_545 9_445 ? 
In2 In1 Sr 138.996(3) 17_566 9_445 ? 
In2 In1 Sr 138.996(3) 9_545 9_445 ? 
Mg2 In1 Sr 73.561(5) 17_556 9_445 ? 
In2 In1 Sr 73.561(5) 9_445 9_445 ? 
Mg2 In1 Sr 73.561(5) 9_445 9_445 ? 
In2 In1 Sr 73.561(5) 17_556 9_445 ? 
In1 In1 Sr 67.016(6) 17_556 9 ? 
Mg2 In1 Sr 73.561(5) 17_566 9 ? 
Mg2 In1 Sr 73.561(5) 9_545 9 ? 
In2 In1 Sr 73.561(5) 17_566 9 ? 
In2 In1 Sr 73.561(5) 9_545 9 ? 
Mg2 In1 Sr 138.996(3) 17_556 9 ? 
In2 In1 Sr 138.996(3) 9_445 9 ? 
Mg2 In1 Sr 138.996(3) 9_445 9 ? 
In2 In1 Sr 138.996(3) 17_556 9 ? 
Sr In1 Sr 134.032(12) 9_445 9 ? 
In1 In1 Sr 67.016(6) 17_556 9_545 ? 
Mg2 In1 Sr 138.996(3) 17_566 9_545 ? 
Mg2 In1 Sr 73.561(5) 9_545 9_545 ? 
In2 In1 Sr 138.996(3) 17_566 9_545 ? 
In2 In1 Sr 73.561(5) 9_545 9_545 ? 
Mg2 In1 Sr 73.561(5) 17_556 9_545 ? 
In2 In1 Sr 138.996(3) 9_445 9_545 ? 
Mg2 In1 Sr 138.996(3) 9_445 9_545 ? 
In2 In1 Sr 73.561(5) 17_556 9_545 ? 
Sr In1 Sr 81.230(4) 9_445 9_545 ? 
Sr In1 Sr 81.230(4) 9 9_545 ? 
In1 In2 In1 111.394(7) 17_566 9_454 ? 
In1 In2 In1 105.691(13) 17_566 17_556 ? 
In1 In2 In1 111.394(7) 9_454 17_556 ? 
In1 In2 In1 111.394(7) 17_566 9_554 ? 
In1 In2 In1 105.691(13) 9_454 9_554 ? 
In1 In2 In1 111.394(7) 17_556 9_554 ? 
In1 In2 Mg2 55.697(3) 17_566 25_565 ? 
In1 In2 Mg2 124.303(3) 9_454 25_565 ? 
In1 In2 Mg2 124.303(3) 17_556 25_565 ? 
In1 In2 Mg2 55.697(3) 9_554 25_565 ? 
In1 In2 Mg2 124.303(3) 17_566 25_455 ? 
In1 In2 Mg2 55.697(3) 9_454 25_455 ? 
In1 In2 Mg2 55.697(3) 17_556 25_455 ? 
In1 In2 Mg2 124.303(3) 9_554 25_455 ? 
Mg2 In2 Mg2 180.0 25_565 25_455 ? 
In1 In2 In2 55.697(3) 17_566 25_565 ? 
In1 In2 In2 124.303(3) 9_454 25_565 ? 
In1 In2 In2 124.303(3) 17_556 25_565 ? 
In1 In2 In2 55.697(3) 9_554 25_565 ? 
Mg2 In2 In2 0.0 25_565 25_565 ? 
Mg2 In2 In2 180.0 25_455 25_565 ? 
In1 In2 In2 124.303(3) 17_566 25_455 ? 
In1 In2 In2 55.697(3) 9_454 25_455 ? 
In1 In2 In2 55.697(3) 17_556 25_455 ? 
In1 In2 In2 124.303(3) 9_554 25_455 ? 
Mg2 In2 In2 180.0 25_565 25_455 ? 
Mg2 In2 In2 0.0 25_455 25_455 ? 
In2 In2 In2 180.0 25_565 25_455 ? 
In1 In2 Mg2 55.697(3) 17_566 25_465 ? 
In1 In2 Mg2 55.697(3) 9_454 25_465 ? 
In1 In2 Mg2 124.303(3) 17_556 25_465 ? 
In1 In2 Mg2 124.303(3) 9_554 25_465 ? 
Mg2 In2 Mg2 90.0 25_565 25_465 ? 
Mg2 In2 Mg2 90.0 25_455 25_465 ? 
In2 In2 Mg2 90.0 25_565 25_465 ? 
In2 In2 Mg2 90.0 25_455 25_465 ? 
In1 In2 Mg2 124.303(3) 17_566 25 ? 
In1 In2 Mg2 124.303(3) 9_454 25 ? 
In1 In2 Mg2 55.697(3) 17_556 25 ? 
In1 In2 Mg2 55.697(3) 9_554 25 ? 
Mg2 In2 Mg2 90.0 25_565 25 ? 
Mg2 In2 Mg2 90.0 25_455 25 ? 
In2 In2 Mg2 90.0 25_565 25 ? 
In2 In2 Mg2 90.0 25_455 25 ? 
Mg2 In2 Mg2 180.0 25_465 25 ? 
In1 In2 In2 124.303(3) 17_566 25 ? 
In1 In2 In2 124.303(3) 9_454 25 ? 
In1 In2 In2 55.697(3) 17_556 25 ? 
In1 In2 In2 55.697(3) 9_554 25 ? 
Mg2 In2 In2 90.0 25_565 25 ? 
Mg2 In2 In2 90.0 25_455 25 ? 
In2 In2 In2 90.0 25_565 25 ? 
In2 In2 In2 90.0 25_455 25 ? 
Mg2 In2 In2 180.0 25_465 25 ? 
Mg2 In2 In2 0.0 25 25 ? 
In1 In2 In2 55.697(3) 17_566 25_465 ? 
In1 In2 In2 55.697(3) 9_454 25_465 ? 
In1 In2 In2 124.303(3) 17_556 25_465 ? 
In1 In2 In2 124.303(3) 9_554 25_465 ? 
Mg2 In2 In2 90.0 25_565 25_465 ? 
Mg2 In2 In2 90.0 25_455 25_465 ? 
In2 In2 In2 90.0 25_565 25_465 ? 
In2 In2 In2 90.0 25_455 25_465 ? 
Mg2 In2 In2 0.0 25_465 25_465 ? 
Mg2 In2 In2 180.0 25 25_465 ? 
In2 In2 In2 180.0 25 25_465 ? 
  
_diffrn_measured_fraction_theta_max    0.992 
_diffrn_reflns_theta_full              28.25 
_diffrn_measured_fraction_theta_full   0.992 
_refine_diff_density_max    0.542 
_refine_diff_density_min   -1.121 
_refine_diff_density_rms    0.253 
#===END  
  
data_SrMgIn3 
  
_audit_creation_method            SHELXL-97 
_chemical_name_systematic 
; 
 ? 
; 
_chemical_name_common             ? 
_chemical_melting_point           ? 
_chemical_formula_moiety          ? 
_chemical_formula_sum 
 'In3 Mg Sr' 
_chemical_formula_weight          456.39 
  
loop_ 
 _atom_type_symbol 
 _atom_type_description 
 _atom_type_scat_dispersion_real 
 _atom_type_scat_dispersion_imag 
 _atom_type_scat_source 
 'Mg'  'Mg'   0.0486   0.0363 
 'International Tables Vol C Tables 4.2.6.8 and 6.1.1.4' 
 'Sr'  'Sr'  -1.5307   3.2498 
 'International Tables Vol C Tables 4.2.6.8 and 6.1.1.4' 
 'In'  'In'  -0.7276   1.3100 
 'International Tables Vol C Tables 4.2.6.8 and 6.1.1.4' 
  
_symmetry_cell_setting            Tetragonal 
_symmetry_space_group_name_H-M    I-4m2 
  
loop_ 
 _symmetry_equiv_pos_as_xyz 
 'x, y, z' 
 '-x, -y, z' 
 'y, -x, -z' 
 '-y, x, -z' 
 'x, -y, z' 
 '-x, y, z' 
 'y, x, -z' 
 '-y, -x, -z' 
 'x+1/2, y+1/2, z+1/2' 
 '-x+1/2, -y+1/2, z+1/2' 
 'y+1/2, -x+1/2, -z+1/2' 
 '-y+1/2, x+1/2, -z+1/2' 
 'x+1/2, -y+1/2, z+1/2' 
 '-x+1/2, y+1/2, z+1/2' 
 'y+1/2, x+1/2, -z+1/2' 
 '-y+1/2, -x+1/2, -z+1/2' 
  
_cell_length_a                    4.6895(7) 
_cell_length_b                    4.6895(7) 
_cell_length_c                    12.629(3) 
_cell_angle_alpha                 90.00 
_cell_angle_beta                  90.00 
_cell_angle_gamma                 90.00 
_cell_volume                      277.73(10) 
_cell_formula_units_Z             2 
_cell_measurement_temperature     566(2) 
_cell_measurement_reflns_used     1081 
_cell_measurement_theta_min       3.23 
_cell_measurement_theta_max       27.94 
  
_exptl_crystal_description        irregular 
_exptl_crystal_colour             silver 
_exptl_crystal_size_max           0.21 
_exptl_crystal_size_mid           0.13 
_exptl_crystal_size_min           0.11 
_exptl_crystal_density_meas       'not measured'
_exptl_crystal_density_diffrn     5.457 
_exptl_crystal_density_method     'not measured' 
_exptl_crystal_F_000              394 
_exptl_absorpt_coefficient_mu     21.787 
_exptl_absorpt_correction_type    empirical 
_exptl_absorpt_correction_T_min   0.1740 
_exptl_absorpt_correction_T_max   0.3067 
_exptl_absorpt_process_details    ? 
  
_exptl_special_details 
; 
 ? 
; 
  
_diffrn_ambient_temperature       566(2) 
_diffrn_radiation_wavelength      0.71073 
_diffrn_radiation_type            MoK\a 
_diffrn_radiation_source          'fine-focus sealed tube' 
_diffrn_radiation_monochromator   graphite 
_diffrn_measurement_device_type   'CCD area detector' 
_diffrn_measurement_method        'phi and omega scans' 
_diffrn_detector_area_resol_mean  ? 
_diffrn_standards_number          ? 
_diffrn_standards_interval_count  ? 
_diffrn_standards_interval_time   ? 
_diffrn_standards_decay_%         ? 
_diffrn_reflns_number             1171 
_diffrn_reflns_av_R_equivalents   0.0692 
_diffrn_reflns_av_sigmaI/netI     0.0323 
_diffrn_reflns_limit_h_min        -6 
_diffrn_reflns_limit_h_max        6 
_diffrn_reflns_limit_k_min        -6 
_diffrn_reflns_limit_k_max        5 
_diffrn_reflns_limit_l_min        -16 
_diffrn_reflns_limit_l_max        16 
_diffrn_reflns_theta_min          3.23 
_diffrn_reflns_theta_max          27.94 
_reflns_number_total              207 
_reflns_number_gt                 206 
_reflns_threshold_expression      >2sigma(I) 
  
_computing_data_collection        'Bruker SMART' 
_computing_cell_refinement        'Bruker SMART' 
_computing_data_reduction         'Bruker SAINT' 
_computing_structure_solution     'SHELXS-97 (Sheldrick, 1990)' 
_computing_structure_refinement   'SHELXL-97 (Sheldrick, 1997)' 
_computing_molecular_graphics     'Bruker SHELXTL' 
_computing_publication_material   'Bruker SHELXTL' 
  
_refine_special_details 
; 
 Refinement of F^2^ against ALL reflections.  The weighted R-factor wR and 
 goodness of fit S are based on F^2^, conventional R-factors R are based 
 on F, with F set to zero for negative F^2^. The threshold expression of 
 F^2^ > 2sigma(F^2^) is used only for calculating R-factors(gt) etc. and is 
 not relevant to the choice of reflections for refinement.  R-factors based 
 on F^2^ are statistically about twice as large as those based on F, and R- 
 factors based on ALL data will be even larger. 
; 
  
_refine_ls_structure_factor_coef  Fsqd 
_refine_ls_matrix_type            full 
_refine_ls_weighting_scheme       calc 
_refine_ls_weighting_details 
 'calc w=1/[\s^2^(Fo^2^)+(0.0045P)^2^+0.0000P] where P=(Fo^2^+2Fc^2^)/3' 
_atom_sites_solution_primary      direct 
_atom_sites_solution_secondary    difmap 
_atom_sites_solution_hydrogens    '.' 
_refine_ls_hydrogen_treatment     '.' 
_refine_ls_extinction_method      SHELXL 
_refine_ls_extinction_coef        0.0126(8) 
_refine_ls_extinction_expression 
 'Fc^*^=kFc[1+0.001xFc^2^\l^3^/sin(2\q)]^-1/4^' 
_refine_ls_abs_structure_details 
 'Flack H D (1983), Acta Cryst. A39, 876-881' 
_refine_ls_abs_structure_Flack    0.0(3) 
_refine_ls_number_reflns          207 
_refine_ls_number_parameters      13 
_refine_ls_number_restraints      0 
_refine_ls_R_factor_all           0.0152 
_refine_ls_R_factor_gt            0.0151 
_refine_ls_wR_factor_ref          0.0307 
_refine_ls_wR_factor_gt           0.0307 
_refine_ls_goodness_of_fit_ref    1.216 
_refine_ls_restrained_S_all       1.216 
_refine_ls_shift/su_max           0.001 
_refine_ls_shift/su_mean          0.000 
  
loop_ 
 _atom_site_label 
 _atom_site_type_symbol 
 _atom_site_fract_x 
 _atom_site_fract_y 
 _atom_site_fract_z 
 _atom_site_U_iso_or_equiv 
 _atom_site_adp_type 
 _atom_site_occupancy 
 _atom_site_symmetry_multiplicity 
 _atom_site_calc_flag 
 _atom_site_refinement_flags 
 _atom_site_disorder_assembly 
 _atom_site_disorder_group 
Sr Sr 0.0000 0.0000 0.0000 0.0166(2) Uani 1 8 d S . . 
In1 In 0.0000 0.0000 0.61080(3) 0.01629(16) Uani 1 4 d S . . 
In2 In 0.0000 0.5000 0.2500 0.01581(19) Uani 1 8 d S . . 
Mg Mg 0.0000 0.5000 0.7500 0.0139(5) Uani 1 8 d S . . 
  
loop_ 
 _atom_site_aniso_label 
 _atom_site_aniso_U_11 
 _atom_site_aniso_U_22 
 _atom_site_aniso_U_33 
 _atom_site_aniso_U_23 
 _atom_site_aniso_U_13 
 _atom_site_aniso_U_12 
Sr 0.0149(2) 0.0149(2) 0.0202(4) 0.000 0.000 0.000 
In1 0.0162(3) 0.0214(3) 0.0113(2) 0.000 0.000 0.000 
In2 0.0151(2) 0.0151(2) 0.0172(3) 0.000 0.000 0.000 
Mg 0.0131(9) 0.0131(9) 0.0155(11) 0.000 0.000 0.000 
  
_geom_special_details 
; 
 All esds (except the esd in the dihedral angle between two l.s. planes) 
 are estimated using the full covariance matrix.  The cell esds are taken 
 into account individually in the estimation of esds in distances, angles 
 and torsion angles; correlations between esds in cell parameters are only 
 used when they are defined by crystal symmetry.  An approximate (isotropic) 
 treatment of cell esds is used for estimating esds involving l.s. planes. 
; 
  
loop_ 
 _geom_bond_atom_site_label_1 
 _geom_bond_atom_site_label_2 
 _geom_bond_distance 
 _geom_bond_site_symmetry_2 
 _geom_bond_publ_flag 
Sr In1 3.5991(5) 11_445 ? 
Sr In1 3.5991(5) 9_554 ? 
Sr In1 3.5991(5) 11 ? 
Sr In1 3.5991(5) 9_444 ? 
Sr In1 3.5991(5) 11_455 ? 
Sr In1 3.5991(5) 11_545 ? 
Sr In1 3.5991(5) 9_454 ? 
Sr In1 3.5991(5) 9_544 ? 
Sr Mg 3.9327(7) 9_544 ? 
Sr Mg 3.9327(7) 1_544 ? 
Sr In2 3.9327(7) . ? 
Sr In2 3.9327(7) 9_444 ? 
In1 In1 2.7986(10) 3_556 ? 
In1 In2 2.9306(4) 9_545 ? 
In1 Mg 2.9306(4) . ? 
In1 Mg 2.9306(4) 1_545 ? 
In1 In2 2.9306(4) 9_445 ? 
In1 Sr 3.5991(5) 9_445 ? 
In1 Sr 3.5991(5) 9 ? 
In1 Sr 3.5991(5) 9_455 ? 
In1 Sr 3.5991(5) 9_545 ? 
In2 In1 2.9306(5) 3_566 ? 
In2 In1 2.9306(4) 9_454 ? 
In2 In1 2.9306(4) 3_556 ? 
In2 In1 2.9306(5) 9_554 ? 
In2 Mg 3.3160(5) 9_554 ? 
In2 Mg 3.3160(5) 9_444 ? 
In2 Mg 3.3160(5) 9_454 ? 
In2 Mg 3.3160(5) 9_544 ? 
In2 Sr 3.9327(7) 9 ? 
In2 Sr 3.9327(7) 1_565 ? 
In2 Sr 3.9327(7) 9_455 ? 
Mg In1 2.9306(4) 11_556 ? 
Mg In1 2.9306(5) 11_456 ? 
Mg In1 2.9306(4) 1_565 ? 
Mg In2 3.3160(5) 9 ? 
Mg In2 3.3160(5) 9_445 ? 
Mg In2 3.3160(5) 9_455 ? 
Mg In2 3.3160(5) 9_545 ? 
Mg Sr 3.9327(7) 1_566 ? 
Mg Sr 3.9327(7) 9_455 ? 
Mg Sr 3.9327(7) 9 ? 
Mg Sr 3.9327(7) 1_556 ? 
  
loop_ 
 _geom_angle_atom_site_label_1 
 _geom_angle_atom_site_label_2 
 _geom_angle_atom_site_label_3 
 _geom_angle 
 _geom_angle_site_symmetry_1 
 _geom_angle_site_symmetry_3 
 _geom_angle_publ_flag 
In1 Sr In1 180.000(10) 11_445 9_554 ? 
In1 Sr In1 134.241(16) 11_445 11 ? 
In1 Sr In1 45.759(16) 9_554 11 ? 
In1 Sr In1 45.759(16) 11_445 9_444 ? 
In1 Sr In1 134.241(16) 9_554 9_444 ? 
In1 Sr In1 180.000(10) 11 9_444 ? 
In1 Sr In1 81.306(6) 11_445 11_455 ? 
In1 Sr In1 98.694(6) 9_554 11_455 ? 
In1 Sr In1 81.306(6) 11 11_455 ? 
In1 Sr In1 98.694(6) 9_444 11_455 ? 
In1 Sr In1 81.306(6) 11_445 11_545 ? 
In1 Sr In1 98.694(6) 9_554 11_545 ? 
In1 Sr In1 81.306(6) 11 11_545 ? 
In1 Sr In1 98.694(6) 9_444 11_545 ? 
In1 Sr In1 134.241(16) 11_455 11_545 ? 
In1 Sr In1 98.694(6) 11_445 9_454 ? 
In1 Sr In1 81.306(6) 9_554 9_454 ? 
In1 Sr In1 98.694(6) 11 9_454 ? 
In1 Sr In1 81.306(6) 9_444 9_454 ? 
In1 Sr In1 45.759(16) 11_455 9_454 ? 
In1 Sr In1 180.000(10) 11_545 9_454 ? 
In1 Sr In1 98.694(6) 11_445 9_544 ? 
In1 Sr In1 81.306(6) 9_554 9_544 ? 
In1 Sr In1 98.694(6) 11 9_544 ? 
In1 Sr In1 81.306(6) 9_444 9_544 ? 
In1 Sr In1 180.000(10) 11_455 9_544 ? 
In1 Sr In1 45.759(16) 11_545 9_544 ? 
In1 Sr In1 134.241(16) 9_454 9_544 ? 
In1 Sr Mg 134.471(4) 11_445 9_544 ? 
In1 Sr Mg 45.529(4) 9_554 9_544 ? 
In1 Sr Mg 85.625(13) 11 9_544 ? 
In1 Sr Mg 94.375(13) 9_444 9_544 ? 
In1 Sr Mg 134.471(4) 11_455 9_544 ? 
In1 Sr Mg 85.625(13) 11_545 9_544 ? 
In1 Sr Mg 94.375(13) 9_454 9_544 ? 
In1 Sr Mg 45.529(4) 9_544 9_544 ? 
In1 Sr Mg 45.529(4) 11_445 1_544 ? 
In1 Sr Mg 134.471(4) 9_554 1_544 ? 
In1 Sr Mg 94.375(13) 11 1_544 ? 
In1 Sr Mg 85.625(13) 9_444 1_544 ? 
In1 Sr Mg 94.375(13) 11_455 1_544 ? 
In1 Sr Mg 45.529(4) 11_545 1_544 ? 
In1 Sr Mg 134.471(4) 9_454 1_544 ? 
In1 Sr Mg 85.625(13) 9_544 1_544 ? 
Mg Sr Mg 130.130(11) 9_544 1_544 ? 
In1 Sr In2 134.471(4) 11_445 . ? 
In1 Sr In2 45.529(4) 9_554 . ? 
In1 Sr In2 85.625(13) 11 . ? 
In1 Sr In2 94.375(13) 9_444 . ? 
In1 Sr In2 85.625(13) 11_455 . ? 
In1 Sr In2 134.471(4) 11_545 . ? 
In1 Sr In2 45.529(4) 9_454 . ? 
In1 Sr In2 94.375(13) 9_544 . ? 
Mg Sr In2 49.870(11) 9_544 . ? 
Mg Sr In2 180.0 1_544 . ? 
In1 Sr In2 45.529(4) 11_445 9_444 ? 
In1 Sr In2 134.471(4) 9_554 9_444 ? 
In1 Sr In2 94.375(13) 11 9_444 ? 
In1 Sr In2 85.625(13) 9_444 9_444 ? 
In1 Sr In2 45.529(4) 11_455 9_444 ? 
In1 Sr In2 94.375(13) 11_545 9_444 ? 
In1 Sr In2 85.625(13) 9_454 9_444 ? 
In1 Sr In2 134.471(4) 9_544 9_444 ? 
Mg Sr In2 180.0 9_544 9_444 ? 
Mg Sr In2 49.870(11) 1_544 9_444 ? 
In2 Sr In2 130.130(11) . 9_444 ? 
In1 In1 In2 126.861(10) 3_556 9_545 ? 
In1 In1 Mg 126.861(10) 3_556 . ? 
In2 In1 Mg 68.909(10) 9_545 . ? 
In1 In1 Mg 126.861(10) 3_556 1_545 ? 
In2 In1 Mg 68.909(10) 9_545 1_545 ? 
Mg In1 Mg 106.28(2) . 1_545 ? 
In1 In1 In2 126.861(10) 3_556 9_445 ? 
In2 In1 In2 106.28(2) 9_545 9_445 ? 
Mg In1 In2 68.909(10) . 9_445 ? 
Mg In1 In2 68.909(10) 1_545 9_445 ? 
In1 In1 Sr 67.121(8) 3_556 9_445 ? 
In2 In1 Sr 138.979(4) 9_545 9_445 ? 
Mg In1 Sr 138.979(4) . 9_445 ? 
Mg In1 Sr 73.261(11) 1_545 9_445 ? 
In2 In1 Sr 73.261(11) 9_445 9_445 ? 
In1 In1 Sr 67.121(8) 3_556 9 ? 
In2 In1 Sr 73.261(11) 9_545 9 ? 
Mg In1 Sr 73.261(11) . 9 ? 
Mg In1 Sr 138.979(4) 1_545 9 ? 
In2 In1 Sr 138.979(4) 9_445 9 ? 
Sr In1 Sr 134.241(16) 9_445 9 ? 
In1 In1 Sr 67.121(8) 3_556 9_455 ? 
In2 In1 Sr 138.979(4) 9_545 9_455 ? 
Mg In1 Sr 73.261(11) . 9_455 ? 
Mg In1 Sr 138.979(4) 1_545 9_455 ? 
In2 In1 Sr 73.261(11) 9_445 9_455 ? 
Sr In1 Sr 81.306(6) 9_445 9_455 ? 
Sr In1 Sr 81.306(6) 9 9_455 ? 
In1 In1 Sr 67.121(8) 3_556 9_545 ? 
In2 In1 Sr 73.261(11) 9_545 9_545 ? 
Mg In1 Sr 138.979(4) . 9_545 ? 
Mg In1 Sr 73.261(11) 1_545 9_545 ? 
In2 In1 Sr 138.979(4) 9_445 9_545 ? 
Sr In1 Sr 81.306(6) 9_445 9_545 ? 
Sr In1 Sr 81.306(6) 9 9_545 ? 
Sr In1 Sr 134.241(16) 9_455 9_545 ? 
In1 In2 In1 111.091(10) 3_566 9_454 ? 
In1 In2 In1 106.28(2) 3_566 3_556 ? 
In1 In2 In1 111.091(10) 9_454 3_556 ? 
In1 In2 In1 111.091(10) 3_566 9_554 ? 
In1 In2 In1 106.28(2) 9_454 9_554 ? 
In1 In2 In1 111.091(10) 3_556 9_554 ? 
In1 In2 Mg 55.545(5) 3_566 9_554 ? 
In1 In2 Mg 124.455(5) 9_454 9_554 ? 
In1 In2 Mg 124.455(5) 3_556 9_554 ? 
In1 In2 Mg 55.545(5) 9_554 9_554 ? 
In1 In2 Mg 124.455(5) 3_566 9_444 ? 
In1 In2 Mg 55.545(5) 9_454 9_444 ? 
In1 In2 Mg 55.545(5) 3_556 9_444 ? 
In1 In2 Mg 124.455(5) 9_554 9_444 ? 
Mg In2 Mg 180.0 9_554 9_444 ? 
In1 In2 Mg 55.545(5) 3_566 9_454 ? 
In1 In2 Mg 55.545(5) 9_454 9_454 ? 
In1 In2 Mg 124.455(5) 3_556 9_454 ? 
In1 In2 Mg 124.455(5) 9_554 9_454 ? 
Mg In2 Mg 90.0 9_554 9_454 ? 
Mg In2 Mg 90.0 9_444 9_454 ? 
In1 In2 Mg 124.455(5) 3_566 9_544 ? 
In1 In2 Mg 124.455(5) 9_454 9_544 ? 
In1 In2 Mg 55.545(5) 3_556 9_544 ? 
In1 In2 Mg 55.545(5) 9_554 9_544 ? 
Mg In2 Mg 90.0 9_554 9_544 ? 
Mg In2 Mg 90.0 9_444 9_544 ? 
Mg In2 Mg 180.0 9_454 9_544 ? 
In1 In2 Sr 163.460(5) 3_566 . ? 
In1 In2 Sr 61.210(10) 9_454 . ? 
In1 In2 Sr 90.262(18) 3_556 . ? 
In1 In2 Sr 61.210(10) 9_554 . ? 
Mg In2 Sr 114.935(5) 9_554 . ? 
Mg In2 Sr 65.065(5) 9_444 . ? 
Mg In2 Sr 114.935(5) 9_454 . ? 
Mg In2 Sr 65.065(5) 9_544 . ? 
In1 In2 Sr 61.210(10) 3_566 9 ? 
In1 In2 Sr 163.460(5) 9_454 9 ? 
In1 In2 Sr 61.210(10) 3_556 9 ? 
In1 In2 Sr 90.262(18) 9_554 9 ? 
Mg In2 Sr 65.065(5) 9_554 9 ? 
Mg In2 Sr 114.935(5) 9_444 9 ? 
Mg In2 Sr 114.935(5) 9_454 9 ? 
Mg In2 Sr 65.065(5) 9_544 9 ? 
Sr In2 Sr 130.130(10) . 9 ? 
In1 In2 Sr 90.262(18) 3_566 1_565 ? 
In1 In2 Sr 61.210(10) 9_454 1_565 ? 
In1 In2 Sr 163.460(5) 3_556 1_565 ? 
In1 In2 Sr 61.210(10) 9_554 1_565 ? 
Mg In2 Sr 65.065(5) 9_554 1_565 ? 
Mg In2 Sr 114.935(5) 9_444 1_565 ? 
Mg In2 Sr 65.065(5) 9_454 1_565 ? 
Mg In2 Sr 114.935(5) 9_544 1_565 ? 
Sr In2 Sr 73.198(17) . 1_565 ? 
Sr In2 Sr 130.130(11) 9 1_565 ? 
In1 In2 Sr 61.210(10) 3_566 9_455 ? 
In1 In2 Sr 90.262(18) 9_454 9_455 ? 
In1 In2 Sr 61.210(10) 3_556 9_455 ? 
In1 In2 Sr 163.460(5) 9_554 9_455 ? 
Mg In2 Sr 114.935(5) 9_554 9_455 ? 
Mg In2 Sr 65.065(5) 9_444 9_455 ? 
Mg In2 Sr 65.065(5) 9_454 9_455 ? 
Mg In2 Sr 114.935(5) 9_544 9_455 ? 
Sr In2 Sr 130.130(11) . 9_455 ? 
Sr In2 Sr 73.198(17) 9 9_455 ? 
Sr In2 Sr 130.130(11) 1_565 9_455 ? 
In1 Mg In1 111.091(10) 11_556 . ? 
In1 Mg In1 106.28(2) 11_556 11_456 ? 
In1 Mg In1 111.091(10) . 11_456 ? 
In1 Mg In1 111.091(10) 11_556 1_565 ? 
In1 Mg In1 106.28(2) . 1_565 ? 
In1 Mg In1 111.091(10) 11_456 1_565 ? 
In1 Mg In2 55.545(5) 11_556 9 ? 
In1 Mg In2 124.455(5) . 9 ? 
In1 Mg In2 124.455(5) 11_456 9 ? 
In1 Mg In2 55.545(5) 1_565 9 ? 
In1 Mg In2 124.455(5) 11_556 9_445 ? 
In1 Mg In2 55.545(5) . 9_445 ? 
In1 Mg In2 55.545(5) 11_456 9_445 ? 
In1 Mg In2 124.455(5) 1_565 9_445 ? 
In2 Mg In2 180.0 9 9_445 ? 
In1 Mg In2 124.455(5) 11_556 9_455 ? 
In1 Mg In2 124.455(5) . 9_455 ? 
In1 Mg In2 55.545(5) 11_456 9_455 ? 
In1 Mg In2 55.545(5) 1_565 9_455 ? 
In2 Mg In2 90.0 9 9_455 ? 
In2 Mg In2 90.0 9_445 9_455 ? 
In1 Mg In2 55.545(5) 11_556 9_545 ? 
In1 Mg In2 55.545(5) . 9_545 ? 
In1 Mg In2 124.455(5) 11_456 9_545 ? 
In1 Mg In2 124.455(5) 1_565 9_545 ? 
In2 Mg In2 90.0 9 9_545 ? 
In2 Mg In2 90.0 9_445 9_545 ? 
In2 Mg In2 180.0 9_455 9_545 ? 
In1 Mg Sr 61.210(10) 11_556 1_566 ? 
In1 Mg Sr 163.460(5) . 1_566 ? 
In1 Mg Sr 61.210(10) 11_456 1_566 ? 
In1 Mg Sr 90.262(18) 1_565 1_566 ? 
In2 Mg Sr 65.065(5) 9 1_566 ? 
In2 Mg Sr 114.935(5) 9_445 1_566 ? 
In2 Mg Sr 65.065(5) 9_455 1_566 ? 
In2 Mg Sr 114.935(5) 9_545 1_566 ? 
In1 Mg Sr 163.460(5) 11_556 9_455 ? 
In1 Mg Sr 61.210(10) . 9_455 ? 
In1 Mg Sr 90.262(18) 11_456 9_455 ? 
In1 Mg Sr 61.210(10) 1_565 9_455 ? 
In2 Mg Sr 114.935(5) 9 9_455 ? 
In2 Mg Sr 65.065(5) 9_445 9_455 ? 
In2 Mg Sr 65.065(5) 9_455 9_455 ? 
In2 Mg Sr 114.935(5) 9_545 9_455 ? 
Sr Mg Sr 130.130(11) 1_566 9_455 ? 
In1 Mg Sr 90.262(18) 11_556 9 ? 
In1 Mg Sr 61.210(10) . 9 ? 
In1 Mg Sr 163.460(5) 11_456 9 ? 
In1 Mg Sr 61.210(10) 1_565 9 ? 
In2 Mg Sr 65.065(5) 9 9 ? 
In2 Mg Sr 114.935(5) 9_445 9 ? 
In2 Mg Sr 114.935(5) 9_455 9 ? 
In2 Mg Sr 65.065(5) 9_545 9 ? 
Sr Mg Sr 130.130(11) 1_566 9 ? 
Sr Mg Sr 73.198(17) 9_455 9 ? 
In1 Mg Sr 61.210(10) 11_556 1_556 ? 
In1 Mg Sr 90.262(18) . 1_556 ? 
In1 Mg Sr 61.210(10) 11_456 1_556 ? 
In1 Mg Sr 163.460(5) 1_565 1_556 ? 
In2 Mg Sr 114.935(5) 9 1_556 ? 
In2 Mg Sr 65.065(5) 9_445 1_556 ? 
In2 Mg Sr 114.935(5) 9_455 1_556 ? 
In2 Mg Sr 65.065(5) 9_545 1_556 ? 
Sr Mg Sr 73.198(17) 1_566 1_556 ? 
Sr Mg Sr 130.130(11) 9_455 1_556 ? 
Sr Mg Sr 130.130(11) 9 1_556 ? 
  
_diffrn_measured_fraction_theta_max    0.984 
_diffrn_reflns_theta_full              27.94 
_diffrn_measured_fraction_theta_full   0.984 
_refine_diff_density_max    0.422 
_refine_diff_density_min   -0.852 
_refine_diff_density_rms    0.150 
#===END  
  
data_SrMg0.85In3.15 
  
_audit_creation_method            SHELXL-97 
_chemical_name_systematic 
; 
 ? 
; 
_chemical_name_common             ? 
_chemical_melting_point           ? 
_chemical_formula_moiety          ? 
_chemical_formula_sum 
 'In3.15 Mg0.85 Sr' 
_chemical_formula_weight          470.42 
  
loop_ 
 _atom_type_symbol 
 _atom_type_description 
 _atom_type_scat_dispersion_real 
 _atom_type_scat_dispersion_imag 
 _atom_type_scat_source 
 'Mg'  'Mg'   0.0486   0.0363 
 'International Tables Vol C Tables 4.2.6.8 and 6.1.1.4' 
 'Sr'  'Sr'  -1.5307   3.2498 
 'International Tables Vol C Tables 4.2.6.8 and 6.1.1.4' 
 'In'  'In'  -0.7276   1.3100 
 'International Tables Vol C Tables 4.2.6.8 and 6.1.1.4' 
  
_symmetry_cell_setting            Tetragonal 
_symmetry_space_group_name_H-M    I-4m2 
  
loop_ 
 _symmetry_equiv_pos_as_xyz 
 'x, y, z' 
 '-x, -y, z' 
 'y, -x, -z' 
 '-y, x, -z' 
 'x, -y, z' 
 '-x, y, z' 
 'y, x, -z' 
 '-y, -x, -z' 
 'x+1/2, y+1/2, z+1/2' 
 '-x+1/2, -y+1/2, z+1/2' 
 'y+1/2, -x+1/2, -z+1/2' 
 '-y+1/2, x+1/2, -z+1/2' 
 'x+1/2, -y+1/2, z+1/2' 
 '-x+1/2, y+1/2, z+1/2' 
 'y+1/2, x+1/2, -z+1/2' 
 '-y+1/2, -x+1/2, -z+1/2' 
  
_cell_length_a                    4.7093(3) 
_cell_length_b                    4.7093(3) 
_cell_length_c                    12.5630(15) 
_cell_angle_alpha                 90.00 
_cell_angle_beta                  90.00 
_cell_angle_gamma                 90.00 
_cell_volume                      278.62(4) 
_cell_formula_units_Z             2 
_cell_measurement_temperature     296(2) 
_cell_measurement_reflns_used     1522 
_cell_measurement_theta_min       3.24 
_cell_measurement_theta_max       27.83 
  
_exptl_crystal_description        irrdegular 
_exptl_crystal_colour             silver 
_exptl_crystal_size_max           0.17 
_exptl_crystal_size_mid           0.13 
_exptl_crystal_size_min           0.11 
_exptl_crystal_density_meas       'not measured' 
_exptl_crystal_density_diffrn     5.607 
_exptl_crystal_density_method     'not measured' 
_exptl_crystal_F_000              405 
_exptl_absorpt_coefficient_mu     22.326 
_exptl_absorpt_correction_type    empirical 
_exptl_absorpt_correction_T_min   0.2068 
_exptl_absorpt_correction_T_max   0.3003 
_exptl_absorpt_process_details    ? 
  
_exptl_special_details 
; 
 ? 
; 
  
_diffrn_ambient_temperature       296(2) 
_diffrn_radiation_wavelength      0.71073 
_diffrn_radiation_type            MoK\a 
_diffrn_radiation_source          'fine-focus sealed tube' 
_diffrn_radiation_monochromator   graphite 
_diffrn_measurement_device_type   'CCD area detector' 
_diffrn_measurement_method        'phi and omega scans' 
_diffrn_detector_area_resol_mean  ? 
_diffrn_standards_number          ? 
_diffrn_standards_interval_count  ? 
_diffrn_standards_interval_time   ? 
_diffrn_standards_decay_%         ? 
_diffrn_reflns_number             1609 
_diffrn_reflns_av_R_equivalents   0.0411 
_diffrn_reflns_av_sigmaI/netI     0.0161 
_diffrn_reflns_limit_h_min        -6 
_diffrn_reflns_limit_h_max        6 
_diffrn_reflns_limit_k_min        -6 
_diffrn_reflns_limit_k_max        6 
_diffrn_reflns_limit_l_min        -16 
_diffrn_reflns_limit_l_max        16 
_diffrn_reflns_theta_min          3.24 
_diffrn_reflns_theta_max          27.83 
_reflns_number_total              208 
_reflns_number_gt                 208 
_reflns_threshold_expression      >2sigma(I) 
  
_computing_data_collection        'Bruker SMART' 
_computing_cell_refinement        'Bruker SMART' 
_computing_data_reduction         'Bruker SAINT' 
_computing_structure_solution     'SHELXS-97 (Sheldrick, 1990)' 
_computing_structure_refinement   'SHELXL-97 (Sheldrick, 1997)' 
_computing_molecular_graphics     'Bruker SHELXTL' 
_computing_publication_material   'Bruker SHELXTL' 
  
_refine_special_details 
; 
 Refinement of F^2^ against ALL reflections.  The weighted R-factor wR and 
 goodness of fit S are based on F^2^, conventional R-factors R are based 
 on F, with F set to zero for negative F^2^. The threshold expression of 
 F^2^ > 2sigma(F^2^) is used only for calculating R-factors(gt) etc. and is 
 not relevant to the choice of reflections for refinement.  R-factors based 
 on F^2^ are statistically about twice as large as those based on F, and R- 
 factors based on ALL data will be even larger. 
; 
  
_refine_ls_structure_factor_coef  Fsqd 
_refine_ls_matrix_type            full 
_refine_ls_weighting_scheme       calc 
_refine_ls_weighting_details 
 'calc w=1/[\s^2^(Fo^2^)+(0.0170P)^2^+6.9632P] where P=(Fo^2^+2Fc^2^)/3' 
_atom_sites_solution_primary      direct 
_atom_sites_solution_secondary    difmap 
_atom_sites_solution_hydrogens    '.' 
_refine_ls_hydrogen_treatment     '.' 
_refine_ls_extinction_method      SHELXL 
_refine_ls_extinction_coef        0.0207(16) 
_refine_ls_extinction_expression 
 'Fc^*^=kFc[1+0.001xFc^2^\l^3^/sin(2\q)]^-1/4^' 
_refine_ls_abs_structure_details 
 'Flack H D (1983), Acta Cryst. A39, 876-881' 
_refine_ls_abs_structure_Flack    0.48(4) 
_refine_ls_number_reflns          208 
_refine_ls_number_parameters      13 
_refine_ls_number_restraints      0 
_refine_ls_R_factor_all           0.0227 
_refine_ls_R_factor_gt            0.0227 
_refine_ls_wR_factor_ref          0.0546 
_refine_ls_wR_factor_gt           0.0546 
_refine_ls_goodness_of_fit_ref    1.168 
_refine_ls_restrained_S_all       1.168 
_refine_ls_shift/su_max           0.000 
_refine_ls_shift/su_mean          0.000 
  
loop_ 
 _atom_site_label 
 _atom_site_type_symbol 
 _atom_site_fract_x 
 _atom_site_fract_y 
 _atom_site_fract_z 
 _atom_site_U_iso_or_equiv 
 _atom_site_adp_type 
 _atom_site_occupancy 
 _atom_site_symmetry_multiplicity 
 _atom_site_calc_flag 
 _atom_site_refinement_flags 
 _atom_site_disorder_assembly 
 _atom_site_disorder_group 
Sr Sr 0.0000 0.0000 0.0000 0.0184(4) Uani 1 8 d S . . 
In1 In 0.0000 0.0000 0.61106(7) 0.0179(3) Uani 1 4 d S . . 
In2 In 0.0000 0.5000 0.2500 0.0177(4) Uani 1 8 d S . . 
Mg Mg 0.0000 0.5000 0.7500 0.0178(16) Uani 0.850(10) 8 d SP . . 
In In 0.0000 0.5000 0.7500 0.0178(16) Uani 0.150(10) 8 d SP . . 
  
loop_ 
 _atom_site_aniso_label 
 _atom_site_aniso_U_11 
 _atom_site_aniso_U_22 
 _atom_site_aniso_U_33 
 _atom_site_aniso_U_23 
 _atom_site_aniso_U_13 
 _atom_site_aniso_U_12 
Sr 0.0160(5) 0.0160(5) 0.0233(9) 0.000 0.000 0.000 
In1 0.0177(6) 0.0230(7) 0.0129(4) 0.000 0.000 0.000 
In2 0.0173(5) 0.0173(5) 0.0187(7) 0.000 0.000 0.000 
Mg 0.0178(19) 0.0178(19) 0.018(3) 0.000 0.000 0.000 
In 0.0178(19) 0.0178(19) 0.018(3) 0.000 0.000 0.000 
  
_geom_special_details 
; 
 All esds (except the esd in the dihedral angle between two l.s. planes) 
 are estimated using the full covariance matrix.  The cell esds are taken 
 into account individually in the estimation of esds in distances, angles 
 and torsion angles; correlations between esds in cell parameters are only 
 used when they are defined by crystal symmetry.  An approximate (isotropic) 
 treatment of cell esds is used for estimating esds involving l.s. planes. 
; 
  
loop_ 
 _geom_bond_atom_site_label_1 
 _geom_bond_atom_site_label_2 
 _geom_bond_distance 
 _geom_bond_site_symmetry_2 
 _geom_bond_publ_flag 
Sr In1 3.6105(4) 11_445 ? 
Sr In1 3.6105(4) 9_554 ? 
Sr In1 3.6105(4) 11 ? 
Sr In1 3.6105(4) 9_444 ? 
Sr In1 3.6105(4) 11_455 ? 
Sr In1 3.6105(4) 11_545 ? 
Sr In1 3.6105(4) 9_454 ? 
Sr In1 3.6105(4) 9_544 ? 
Sr In 3.9254(3) 9_544 ? 
Sr In 3.9254(3) 1_544 ? 
Sr In2 3.9254(3) . ? 
Sr Mg 3.9254(3) 9_544 ? 
In1 In1 2.7905(18) 3_556 ? 
In1 In2 2.9311(6) 9_545 ? 
In1 Mg 2.9311(6) . ? 
In1 In 2.9311(5) 1_545 ? 
In1 Mg 2.9311(5) 1_545 ? 
In1 In2 2.9311(5) 9_445 ? 
In1 Sr 3.6105(4) 9_445 ? 
In1 Sr 3.6105(4) 9 ? 
In1 Sr 3.6105(4) 9_455 ? 
In1 Sr 3.6105(4) 9_545 ? 
In2 In1 2.9311(6) 3_566 ? 
In2 In1 2.9311(6) 9_454 ? 
In2 In1 2.9311(5) 3_556 ? 
In2 In1 2.9311(5) 9_554 ? 
In2 In 3.3300(2) 9_554 ? 
In2 In 3.3300(2) 9_444 ? 
In2 Mg 3.3300(2) 9_554 ? 
In2 Mg 3.3300(2) 9_444 ? 
In2 In 3.3300(2) 9_454 ? 
In2 In 3.3300(2) 9_544 ? 
In2 Mg 3.3300(2) 9_544 ? 
In2 Mg 3.3300(2) 9_454 ? 
Mg In1 2.9311(6) 11_556 ? 
Mg In1 2.9311(6) 11_456 ? 
Mg In1 2.9311(6) 1_565 ? 
Mg In2 3.3300(2) 9 ? 
Mg In2 3.3300(2) 9_445 ? 
Mg In2 3.3300(2) 9_455 ? 
Mg In2 3.3300(2) 9_545 ? 
Mg Sr 3.9254(3) 1_566 ? 
Mg Sr 3.9254(3) 9_455 ? 
Mg Sr 3.9254(3) 9 ? 
Mg Sr 3.9254(3) 1_556 ? 
  
loop_ 
 _geom_angle_atom_site_label_1 
 _geom_angle_atom_site_label_2 
 _geom_angle_atom_site_label_3 
 _geom_angle 
 _geom_angle_site_symmetry_1 
 _geom_angle_site_symmetry_3 
 _geom_angle_publ_flag 
In1 Sr In1 180.00(3) 11_445 9_554 ? 
In1 Sr In1 134.53(3) 11_445 11 ? 
In1 Sr In1 45.47(3) 9_554 11 ? 
In1 Sr In1 45.47(3) 11_445 9_444 ? 
In1 Sr In1 134.53(3) 9_554 9_444 ? 
In1 Sr In1 180.00(3) 11 9_444 ? 
In1 Sr In1 81.411(9) 11_445 11_455 ? 
In1 Sr In1 98.589(9) 9_554 11_455 ? 
In1 Sr In1 81.411(9) 11 11_455 ? 
In1 Sr In1 98.589(9) 9_444 11_455 ? 
In1 Sr In1 81.411(9) 11_445 11_545 ? 
In1 Sr In1 98.589(9) 9_554 11_545 ? 
In1 Sr In1 81.411(9) 11 11_545 ? 
In1 Sr In1 98.589(9) 9_444 11_545 ? 
In1 Sr In1 134.53(3) 11_455 11_545 ? 
In1 Sr In1 98.589(9) 11_445 9_454 ? 
In1 Sr In1 81.411(9) 9_554 9_454 ? 
In1 Sr In1 98.589(9) 11 9_454 ? 
In1 Sr In1 81.411(9) 9_444 9_454 ? 
In1 Sr In1 45.47(3) 11_455 9_454 ? 
In1 Sr In1 180.00(3) 11_545 9_454 ? 
In1 Sr In1 98.589(9) 11_445 9_544 ? 
In1 Sr In1 81.411(9) 9_554 9_544 ? 
In1 Sr In1 98.589(9) 11 9_544 ? 
In1 Sr In1 81.411(9) 9_444 9_544 ? 
In1 Sr In1 180.00(3) 11_455 9_544 ? 
In1 Sr In1 45.47(3) 11_545 9_544 ? 
In1 Sr In1 134.53(3) 9_454 9_544 ? 
In1 Sr In 134.460(10) 11_445 9_544 ? 
In1 Sr In 45.540(10) 9_554 9_544 ? 
In1 Sr In 85.296(13) 11 9_544 ? 
In1 Sr In 94.704(13) 9_444 9_544 ? 
In1 Sr In 134.460(10) 11_455 9_544 ? 
In1 Sr In 85.296(13) 11_545 9_544 ? 
In1 Sr In 94.704(13) 9_454 9_544 ? 
In1 Sr In 45.540(10) 9_544 9_544 ? 
In1 Sr In 45.540(10) 11_445 1_544 ? 
In1 Sr In 134.460(10) 9_554 1_544 ? 
In1 Sr In 94.704(13) 11 1_544 ? 
In1 Sr In 85.296(13) 9_444 1_544 ? 
In1 Sr In 94.704(13) 11_455 1_544 ? 
In1 Sr In 45.540(10) 11_545 1_544 ? 
In1 Sr In 134.460(10) 9_454 1_544 ? 
In1 Sr In 85.296(13) 9_544 1_544 ? 
In Sr In 129.805(5) 9_544 1_544 ? 
In1 Sr In2 134.460(10) 11_445 . ? 
In1 Sr In2 45.540(10) 9_554 . ? 
In1 Sr In2 85.296(13) 11 . ? 
In1 Sr In2 94.704(13) 9_444 . ? 
In1 Sr In2 85.296(13) 11_455 . ? 
In1 Sr In2 134.460(10) 11_545 . ? 
In1 Sr In2 45.540(10) 9_454 . ? 
In1 Sr In2 94.704(13) 9_544 . ? 
In Sr In2 50.195(5) 9_544 . ? 
In Sr In2 180.0 1_544 . ? 
In1 Sr Mg 134.460(10) 11_445 9_544 ? 
In1 Sr Mg 45.540(10) 9_554 9_544 ? 
In1 Sr Mg 85.296(13) 11 9_544 ? 
In1 Sr Mg 94.704(13) 9_444 9_544 ? 
In1 Sr Mg 134.460(10) 11_455 9_544 ? 
In1 Sr Mg 85.296(13) 11_545 9_544 ? 
In1 Sr Mg 94.704(13) 9_454 9_544 ? 
In1 Sr Mg 45.540(10) 9_544 9_544 ? 
In Sr Mg 0.0 9_544 9_544 ? 
In Sr Mg 129.805(5) 1_544 9_544 ? 
In2 Sr Mg 50.195(5) . 9_544 ? 
In1 In1 In2 126.550(14) 3_556 9_545 ? 
In1 In1 Mg 126.550(14) 3_556 . ? 
In2 In1 Mg 69.228(15) 9_545 . ? 
In1 In1 In 126.550(14) 3_556 1_545 ? 
In2 In1 In 69.228(15) 9_545 1_545 ? 
Mg In1 In 106.90(3) . 1_545 ? 
In1 In1 Mg 126.550(14) 3_556 1_545 ? 
In2 In1 Mg 69.228(15) 9_545 1_545 ? 
Mg In1 Mg 106.90(3) . 1_545 ? 
In In1 Mg 0.0 1_545 1_545 ? 
In1 In1 In2 126.550(14) 3_556 9_445 ? 
In2 In1 In2 106.90(3) 9_545 9_445 ? 
Mg In1 In2 69.228(15) . 9_445 ? 
In In1 In2 69.228(15) 1_545 9_445 ? 
Mg In1 In2 69.228(15) 1_545 9_445 ? 
In1 In1 Sr 67.267(13) 3_556 9_445 ? 
In2 In1 Sr 138.943(8) 9_545 9_445 ? 
Mg In1 Sr 138.943(8) . 9_445 ? 
In In1 Sr 72.915(5) 1_545 9_445 ? 
Mg In1 Sr 72.915(5) 1_545 9_445 ? 
In2 In1 Sr 72.915(5) 9_445 9_445 ? 
In1 In1 Sr 67.267(13) 3_556 9 ? 
In2 In1 Sr 72.915(5) 9_545 9 ? 
Mg In1 Sr 72.915(5) . 9 ? 
In In1 Sr 138.943(8) 1_545 9 ? 
Mg In1 Sr 138.943(8) 1_545 9 ? 
In2 In1 Sr 138.943(8) 9_445 9 ? 
Sr In1 Sr 134.53(3) 9_445 9 ? 
In1 In1 Sr 67.267(13) 3_556 9_455 ? 
In2 In1 Sr 138.943(8) 9_545 9_455 ? 
Mg In1 Sr 72.915(5) . 9_455 ? 
In In1 Sr 138.943(8) 1_545 9_455 ? 
Mg In1 Sr 138.943(8) 1_545 9_455 ? 
In2 In1 Sr 72.915(5) 9_445 9_455 ? 
Sr In1 Sr 81.411(9) 9_445 9_455 ? 
Sr In1 Sr 81.411(9) 9 9_455 ? 
In1 In1 Sr 67.267(13) 3_556 9_545 ? 
In2 In1 Sr 72.915(5) 9_545 9_545 ? 
Mg In1 Sr 138.943(8) . 9_545 ? 
In In1 Sr 72.915(5) 1_545 9_545 ? 
Mg In1 Sr 72.915(5) 1_545 9_545 ? 
In2 In1 Sr 138.943(8) 9_445 9_545 ? 
Sr In1 Sr 81.411(9) 9_445 9_545 ? 
Sr In1 Sr 81.411(9) 9 9_545 ? 
Sr In1 Sr 134.53(3) 9_455 9_545 ? 
In1 In2 In1 110.772(15) 3_566 9_454 ? 
In1 In2 In1 106.90(3) 3_566 3_556 ? 
In1 In2 In1 110.772(15) 9_454 3_556 ? 
In1 In2 In1 110.772(15) 3_566 9_554 ? 
In1 In2 In1 106.90(3) 9_454 9_554 ? 
In1 In2 In1 110.772(15) 3_556 9_554 ? 
In1 In2 In 55.386(7) 3_566 9_554 ? 
In1 In2 In 124.614(7) 9_454 9_554 ? 
In1 In2 In 124.614(7) 3_556 9_554 ? 
In1 In2 In 55.386(7) 9_554 9_554 ? 
In1 In2 In 124.614(7) 3_566 9_444 ? 
In1 In2 In 55.386(7) 9_454 9_444 ? 
In1 In2 In 55.386(7) 3_556 9_444 ? 
In1 In2 In 124.614(7) 9_554 9_444 ? 
In In2 In 180.0 9_554 9_444 ? 
In1 In2 Mg 55.386(7) 3_566 9_554 ? 
In1 In2 Mg 124.614(7) 9_454 9_554 ? 
In1 In2 Mg 124.614(7) 3_556 9_554 ? 
In1 In2 Mg 55.386(7) 9_554 9_554 ? 
In In2 Mg 0.0 9_554 9_554 ? 
In In2 Mg 180.0 9_444 9_554 ? 
In1 In2 Mg 124.614(7) 3_566 9_444 ? 
In1 In2 Mg 55.386(7) 9_454 9_444 ? 
In1 In2 Mg 55.386(7) 3_556 9_444 ? 
In1 In2 Mg 124.614(7) 9_554 9_444 ? 
In In2 Mg 180.0 9_554 9_444 ? 
In In2 Mg 0.0 9_444 9_444 ? 
Mg In2 Mg 180.0 9_554 9_444 ? 
In1 In2 In 55.386(7) 3_566 9_454 ? 
In1 In2 In 55.386(7) 9_454 9_454 ? 
In1 In2 In 124.614(7) 3_556 9_454 ? 
In1 In2 In 124.614(7) 9_554 9_454 ? 
In In2 In 90.0 9_554 9_454 ? 
In In2 In 90.0 9_444 9_454 ? 
Mg In2 In 90.0 9_554 9_454 ? 
Mg In2 In 90.0 9_444 9_454 ? 
In1 In2 In 124.614(7) 3_566 9_544 ? 
In1 In2 In 124.614(7) 9_454 9_544 ? 
In1 In2 In 55.386(7) 3_556 9_544 ? 
In1 In2 In 55.386(7) 9_554 9_544 ? 
In In2 In 90.0 9_554 9_544 ? 
In In2 In 90.0 9_444 9_544 ? 
Mg In2 In 90.0 9_554 9_544 ? 
Mg In2 In 90.0 9_444 9_544 ? 
In In2 In 180.0 9_454 9_544 ? 
In1 In2 Mg 124.614(7) 3_566 9_544 ? 
In1 In2 Mg 124.614(7) 9_454 9_544 ? 
In1 In2 Mg 55.386(7) 3_556 9_544 ? 
In1 In2 Mg 55.386(7) 9_554 9_544 ? 
In In2 Mg 90.0 9_554 9_544 ? 
In In2 Mg 90.0 9_444 9_544 ? 
Mg In2 Mg 90.0 9_554 9_544 ? 
Mg In2 Mg 90.0 9_444 9_544 ? 
In In2 Mg 180.0 9_454 9_544 ? 
In In2 Mg 0.0 9_544 9_544 ? 
In1 In2 Mg 55.386(7) 3_566 9_454 ? 
In1 In2 Mg 55.386(7) 9_454 9_454 ? 
In1 In2 Mg 124.614(7) 3_556 9_454 ? 
In1 In2 Mg 124.614(7) 9_554 9_454 ? 
In In2 Mg 90.0 9_554 9_454 ? 
In In2 Mg 90.0 9_444 9_454 ? 
Mg In2 Mg 90.0 9_554 9_454 ? 
Mg In2 Mg 90.0 9_444 9_454 ? 
In In2 Mg 0.0 9_454 9_454 ? 
In In2 Mg 180.0 9_544 9_454 ? 
Mg In2 Mg 180.0 9_544 9_454 ? 
In1 Mg In1 110.772(15) 11_556 . ? 
In1 Mg In1 106.90(3) 11_556 11_456 ? 
In1 Mg In1 110.772(15) . 11_456 ? 
In1 Mg In1 110.772(15) 11_556 1_565 ? 
In1 Mg In1 106.90(3) . 1_565 ? 
In1 Mg In1 110.772(15) 11_456 1_565 ? 
In1 Mg In2 55.386(7) 11_556 9 ? 
In1 Mg In2 124.614(7) . 9 ? 
In1 Mg In2 124.614(7) 11_456 9 ? 
In1 Mg In2 55.386(7) 1_565 9 ? 
In1 Mg In2 124.614(7) 11_556 9_445 ? 
In1 Mg In2 55.386(7) . 9_445 ? 
In1 Mg In2 55.386(7) 11_456 9_445 ? 
In1 Mg In2 124.614(7) 1_565 9_445 ? 
In2 Mg In2 180.0 9 9_445 ? 
In1 Mg In2 124.614(7) 11_556 9_455 ? 
In1 Mg In2 124.614(7) . 9_455 ? 
In1 Mg In2 55.386(7) 11_456 9_455 ? 
In1 Mg In2 55.386(7) 1_565 9_455 ? 
In2 Mg In2 90.0 9 9_455 ? 
In2 Mg In2 90.0 9_445 9_455 ? 
In1 Mg In2 55.386(7) 11_556 9_545 ? 
In1 Mg In2 55.386(7) . 9_545 ? 
In1 Mg In2 124.614(7) 11_456 9_545 ? 
In1 Mg In2 124.614(7) 1_565 9_545 ? 
In2 Mg In2 90.0 9 9_545 ? 
In2 Mg In2 90.0 9_445 9_545 ? 
In2 Mg In2 180.0 9_455 9_545 ? 
In1 Mg Sr 61.544(11) 11_556 1_566 ? 
In1 Mg Sr 163.409(14) . 1_566 ? 
In1 Mg Sr 61.544(11) 11_456 1_566 ? 
In1 Mg Sr 89.690(16) 1_565 1_566 ? 
In2 Mg Sr 64.903(2) 9 1_566 ? 
In2 Mg Sr 115.097(2) 9_445 1_566 ? 
In2 Mg Sr 64.903(2) 9_455 1_566 ? 
In2 Mg Sr 115.097(2) 9_545 1_566 ? 
In1 Mg Sr 163.409(14) 11_556 9_455 ? 
In1 Mg Sr 61.544(11) . 9_455 ? 
In1 Mg Sr 89.690(16) 11_456 9_455 ? 
In1 Mg Sr 61.544(11) 1_565 9_455 ? 
In2 Mg Sr 115.097(2) 9 9_455 ? 
In2 Mg Sr 64.903(2) 9_445 9_455 ? 
In2 Mg Sr 64.903(2) 9_455 9_455 ? 
In2 Mg Sr 115.097(2) 9_545 9_455 ? 
Sr Mg Sr 129.805(5) 1_566 9_455 ? 
In1 Mg Sr 89.690(16) 11_556 9 ? 
In1 Mg Sr 61.544(11) . 9 ? 
In1 Mg Sr 163.409(14) 11_456 9 ? 
In1 Mg Sr 61.544(11) 1_565 9 ? 
In2 Mg Sr 64.903(2) 9 9 ? 
In2 Mg Sr 115.097(2) 9_445 9 ? 
In2 Mg Sr 115.097(2) 9_455 9 ? 
In2 Mg Sr 64.903(2) 9_545 9 ? 
Sr Mg Sr 129.805(5) 1_566 9 ? 
Sr Mg Sr 73.718(7) 9_455 9 ? 
In1 Mg Sr 61.544(11) 11_556 1_556 ? 
In1 Mg Sr 89.690(16) . 1_556 ? 
In1 Mg Sr 61.544(11) 11_456 1_556 ? 
In1 Mg Sr 163.409(14) 1_565 1_556 ? 
In2 Mg Sr 115.097(2) 9 1_556 ? 
In2 Mg Sr 64.903(2) 9_445 1_556 ? 
In2 Mg Sr 115.097(2) 9_455 1_556 ? 
In2 Mg Sr 64.903(2) 9_545 1_556 ? 
Sr Mg Sr 73.718(7) 1_566 1_556 ? 
Sr Mg Sr 129.805(5) 9_455 1_556 ? 
Sr Mg Sr 129.805(5) 9 1_556 ? 
  
_diffrn_measured_fraction_theta_max    0.984 
_diffrn_reflns_theta_full              27.83 
_diffrn_measured_fraction_theta_full   0.984 
_refine_diff_density_max    0.577 
_refine_diff_density_min   -1.264 
_refine_diff_density_rms    0.186 
#===END  
  
data_BaMg1.788In2.212 
  
_audit_creation_method            SHELXL-97 
_chemical_name_systematic 
; 
 ? 
; 
_chemical_name_common             ? 
_chemical_melting_point           ? 
_chemical_formula_moiety          ? 
_chemical_formula_sum 
 'Ba In2.21 Mg1.79' 
_chemical_formula_weight          434.61 
  
loop_ 
 _atom_type_symbol 
 _atom_type_description 
 _atom_type_scat_dispersion_real 
 _atom_type_scat_dispersion_imag 
 _atom_type_scat_source 
 'Mg'  'Mg'   0.0486   0.0363 
 'International Tables Vol C Tables 4.2.6.8 and 6.1.1.4' 
 'In'  'In'  -0.7276   1.3100 
 'International Tables Vol C Tables 4.2.6.8 and 6.1.1.4' 
 'Ba'  'Ba'  -0.3244   2.2819 
 'International Tables Vol C Tables 4.2.6.8 and 6.1.1.4' 
  
_symmetry_cell_setting            Tetragonal 
_symmetry_space_group_name_H-M    I4/mmm 
  
loop_ 
 _symmetry_equiv_pos_as_xyz 
 'x, y, z' 
 '-x, -y, z' 
 '-y, x, z' 
 'y, -x, z' 
 '-x, y, -z' 
 'x, -y, -z' 
 'y, x, -z' 
 '-y, -x, -z' 
 'x+1/2, y+1/2, z+1/2' 
 '-x+1/2, -y+1/2, z+1/2' 
 '-y+1/2, x+1/2, z+1/2' 
 'y+1/2, -x+1/2, z+1/2' 
 '-x+1/2, y+1/2, -z+1/2' 
 'x+1/2, -y+1/2, -z+1/2' 
 'y+1/2, x+1/2, -z+1/2' 
 '-y+1/2, -x+1/2, -z+1/2' 
 '-x, -y, -z' 
 'x, y, -z' 
 'y, -x, -z' 
 '-y, x, -z' 
 'x, -y, z' 
 '-x, y, z' 
 '-y, -x, z' 
 'y, x, z' 
 '-x+1/2, -y+1/2, -z+1/2' 
 'x+1/2, y+1/2, -z+1/2' 
 'y+1/2, -x+1/2, -z+1/2' 
 '-y+1/2, x+1/2, -z+1/2' 
 'x+1/2, -y+1/2, z+1/2' 
 '-x+1/2, y+1/2, z+1/2' 
 '-y+1/2, -x+1/2, z+1/2' 
 'y+1/2, x+1/2, z+1/2' 
  
_cell_length_a                    4.8625(7) 
_cell_length_b                    4.8625(7) 
_cell_length_c                    12.515(3) 
_cell_angle_alpha                 90.00 
_cell_angle_beta                  90.00 
_cell_angle_gamma                 90.00 
_cell_volume                      295.90(8) 
_cell_formula_units_Z             2 
_cell_measurement_temperature     296(2) 
_cell_measurement_reflns_used     1081 
_cell_measurement_theta_min       3.17 
_cell_measurement_theta_max       27.15 
  
_exptl_crystal_description        irregular 
_exptl_crystal_colour             silver 
_exptl_crystal_size_max           0.21 
_exptl_crystal_size_mid           0.16 
_exptl_crystal_size_min           0.13 
_exptl_crystal_density_meas       'not measured'  
_exptl_crystal_density_diffrn     4.878 
_exptl_crystal_density_method     'not measured' 
_exptl_crystal_F_000              372 
_exptl_absorpt_coefficient_mu     15.132 
_exptl_absorpt_correction_type    empirical 
_exptl_absorpt_correction_T_min   0.1694 
_exptl_absorpt_correction_T_max   0.3681 
_exptl_absorpt_process_details    ? 
  
_exptl_special_details 
; 
 ? 
; 
  
_diffrn_ambient_temperature       293(2) 
_diffrn_radiation_wavelength      0.71073 
_diffrn_radiation_type            MoK\a 
_diffrn_radiation_source          'fine-focus sealed tube' 
_diffrn_radiation_monochromator   graphite 
_diffrn_measurement_device_type   'CCD area detector' 
_diffrn_measurement_method        'phi and omega scans' 
_diffrn_detector_area_resol_mean  ? 
_diffrn_standards_number          ? 
_diffrn_standards_interval_count  ? 
_diffrn_standards_interval_time   ? 
_diffrn_standards_decay_%         ? 
_diffrn_reflns_number             1427 
_diffrn_reflns_av_R_equivalents   0.0336 
_diffrn_reflns_av_sigmaI/netI     0.0191 
_diffrn_reflns_limit_h_min        -6 
_diffrn_reflns_limit_h_max        6 
_diffrn_reflns_limit_k_min        -6 
_diffrn_reflns_limit_k_max        6 
_diffrn_reflns_limit_l_min        -16 
_diffrn_reflns_limit_l_max        16 
_diffrn_reflns_theta_min          3.26 
_diffrn_reflns_theta_max          27.82 
_reflns_number_total              132 
_reflns_number_gt                 126 
_reflns_threshold_expression      >2sigma(I) 
  
_computing_data_collection        'Bruker SMART' 
_computing_cell_refinement        'Bruker SMART' 
_computing_data_reduction         'Bruker SAINT' 
_computing_structure_solution     'SHELXS-97 (Sheldrick, 1990)' 
_computing_structure_refinement   'SHELXL-97 (Sheldrick, 1997)' 
_computing_molecular_graphics     'Bruker SHELXTL' 
_computing_publication_material   'Bruker SHELXTL' 
  
_refine_special_details 
; 
 Refinement of F^2^ against ALL reflections.  The weighted R-factor wR and 
 goodness of fit S are based on F^2^, conventional R-factors R are based 
 on F, with F set to zero for negative F^2^. The threshold expression of 
 F^2^ > 2sigma(F^2^) is used only for calculating R-factors(gt) etc. and is 
 not relevant to the choice of reflections for refinement.  R-factors based 
 on F^2^ are statistically about twice as large as those based on F, and R- 
 factors based on ALL data will be even larger. 
; 
  
_refine_ls_structure_factor_coef  Fsqd 
_refine_ls_matrix_type            full 
_refine_ls_weighting_scheme       calc 
_refine_ls_weighting_details 
 'calc w=1/[\s^2^(Fo^2^)+(0.0086P)^2^+0.4050P] where P=(Fo^2^+2Fc^2^)/3' 
_atom_sites_solution_primary      direct 
_atom_sites_solution_secondary    difmap 
_atom_sites_solution_hydrogens    '.' 
_refine_ls_hydrogen_treatment     '.' 
_refine_ls_extinction_method      none 
_refine_ls_extinction_coef        ? 
_refine_ls_number_reflns          132 
_refine_ls_number_parameters      9 
_refine_ls_number_restraints      0 
_refine_ls_R_factor_all           0.0137 
_refine_ls_R_factor_gt            0.0128 
_refine_ls_wR_factor_ref          0.0287 
_refine_ls_wR_factor_gt           0.0285 
_refine_ls_goodness_of_fit_ref    1.191 
_refine_ls_restrained_S_all       1.191 
_refine_ls_shift/su_max           0.001 
_refine_ls_shift/su_mean          0.000 
  
loop_ 
 _atom_site_label 
 _atom_site_type_symbol 
 _atom_site_fract_x 
 _atom_site_fract_y 
 _atom_site_fract_z 
 _atom_site_U_iso_or_equiv 
 _atom_site_adp_type 
 _atom_site_occupancy 
 _atom_site_symmetry_multiplicity 
 _atom_site_calc_flag 
 _atom_site_refinement_flags 
 _atom_site_disorder_assembly 
 _atom_site_disorder_group 
Ba Ba 0.0000 0.0000 0.0000 0.01608(17) Uani 1 16 d S . . 
In1 In 0.0000 0.0000 0.61434(3) 0.01725(16) Uani 1 8 d S . . 
In2 In 0.0000 0.5000 0.2500 0.0181(5) Uani 0.106(3) 8 d SP . . 
Mg2 Mg 0.0000 0.5000 0.2500 0.0181(5) Uani 0.894(3) 8 d SP . . 
  
loop_ 
 _atom_site_aniso_label 
 _atom_site_aniso_U_11 
 _atom_site_aniso_U_22 
 _atom_site_aniso_U_33 
 _atom_site_aniso_U_23 
 _atom_site_aniso_U_13 
 _atom_site_aniso_U_12 
Ba 0.0137(2) 0.0137(2) 0.0209(3) 0.000 0.000 0.000 
In1 0.01687(19) 0.01687(19) 0.0180(2) 0.000 0.000 0.000 
In2 0.0180(6) 0.0180(6) 0.0182(9) 0.000 0.000 0.000 
Mg2 0.0180(6) 0.0180(6) 0.0182(9) 0.000 0.000 0.000 
  
_geom_special_details 
; 
 All esds (except the esd in the dihedral angle between two l.s. planes) 
 are estimated using the full covariance matrix.  The cell esds are taken 
 into account individually in the estimation of esds in distances, angles 
 and torsion angles; correlations between esds in cell parameters are only 
 used when they are defined by crystal symmetry.  An approximate (isotropic) 
 treatment of cell esds is used for estimating esds involving l.s. planes. 
; 
  
loop_ 
 _geom_bond_atom_site_label_1 
 _geom_bond_atom_site_label_2 
 _geom_bond_distance 
 _geom_bond_site_symmetry_2 
 _geom_bond_publ_flag 
Ba In1 3.7242(5) 25_445 ? 
Ba In1 3.7242(5) 9_554 ? 
Ba In1 3.7242(5) 25 ? 
Ba In1 3.7242(5) 9_444 ? 
Ba In1 3.7242(5) 9_544 ? 
Ba In1 3.7242(5) 9_454 ? 
Ba In1 3.7242(5) 25_455 ? 
Ba In1 3.7242(5) 25_545 ? 
Ba Mg2 3.9623(5) 25 ? 
Ba In2 3.9623(5) . ? 
Ba Mg2 3.9623(5) 17 ? 
In1 In1 2.8619(9) 17_556 ? 
In1 Mg2 2.9654(4) 17_566 ? 
In1 Mg2 2.9654(4) 9_545 ? 
In1 In2 2.9654(4) 17_566 ? 
In1 In2 2.9654(4) 9_545 ? 
In1 Mg2 2.9654(4) 17_556 ? 
In1 In2 2.9654(4) 9_445 ? 
In1 Mg2 2.9654(4) 9_445 ? 
In1 In2 2.9654(4) 17_556 ? 
In1 Ba 3.7242(5) 9_445 ? 
In1 Ba 3.7242(5) 9 ? 
In1 Ba 3.7242(5) 9_545 ? 
In2 In1 2.9654(4) 17_566 ? 
In2 In1 2.9654(4) 9_454 ? 
In2 In1 2.9654(4) 17_556 ? 
In2 In1 2.9654(4) 9_554 ? 
In2 Mg2 3.4383(5) 25_565 ? 
In2 Mg2 3.4383(5) 25_455 ? 
In2 Mg2 3.4383(5) 25_465 ? 
In2 Mg2 3.4383(5) 25 ? 
In2 Ba 3.9623(5) 9 ? 
In2 Ba 3.9623(5) 1_565 ? 
In2 Ba 3.9623(5) 9_455 ? 
  
loop_ 
 _geom_angle_atom_site_label_1 
 _geom_angle_atom_site_label_2 
 _geom_angle_atom_site_label_3 
 _geom_angle 
 _geom_angle_site_symmetry_1 
 _geom_angle_site_symmetry_3 
 _geom_angle_publ_flag 
In1 Ba In1 180.000(10) 25_445 9_554 ? 
In1 Ba In1 134.808(14) 25_445 25 ? 
In1 Ba In1 45.192(15) 9_554 25 ? 
In1 Ba In1 45.192(15) 25_445 9_444 ? 
In1 Ba In1 134.808(14) 9_554 9_444 ? 
In1 Ba In1 180.000(10) 25 9_444 ? 
In1 Ba In1 98.490(5) 25_445 9_544 ? 
In1 Ba In1 81.510(5) 9_554 9_544 ? 
In1 Ba In1 98.490(5) 25 9_544 ? 
In1 Ba In1 81.510(5) 9_444 9_544 ? 
In1 Ba In1 98.490(5) 25_445 9_454 ? 
In1 Ba In1 81.510(5) 9_554 9_454 ? 
In1 Ba In1 98.490(5) 25 9_454 ? 
In1 Ba In1 81.510(5) 9_444 9_454 ? 
In1 Ba In1 134.808(15) 9_544 9_454 ? 
In1 Ba In1 81.510(5) 25_445 25_455 ? 
In1 Ba In1 98.490(5) 9_554 25_455 ? 
In1 Ba In1 81.510(5) 25 25_455 ? 
In1 Ba In1 98.490(5) 9_444 25_455 ? 
In1 Ba In1 180.000(10) 9_544 25_455 ? 
In1 Ba In1 45.192(15) 9_454 25_455 ? 
In1 Ba In1 81.510(5) 25_445 25_545 ? 
In1 Ba In1 98.490(5) 9_554 25_545 ? 
In1 Ba In1 81.510(5) 25 25_545 ? 
In1 Ba In1 98.490(5) 9_444 25_545 ? 
In1 Ba In1 45.192(15) 9_544 25_545 ? 
In1 Ba In1 180.000(10) 9_454 25_545 ? 
In1 Ba In1 134.808(15) 25_455 25_545 ? 
In1 Ba Mg2 134.746(4) 25_445 25 ? 
In1 Ba Mg2 45.254(4) 9_554 25 ? 
In1 Ba Mg2 84.424(11) 25 25 ? 
In1 Ba Mg2 95.576(11) 9_444 25 ? 
In1 Ba Mg2 45.254(4) 9_544 25 ? 
In1 Ba Mg2 95.576(11) 9_454 25 ? 
In1 Ba Mg2 134.746(4) 25_455 25 ? 
In1 Ba Mg2 84.424(11) 25_545 25 ? 
In1 Ba In2 134.746(4) 25_445 . ? 
In1 Ba In2 45.254(4) 9_554 . ? 
In1 Ba In2 84.424(11) 25 . ? 
In1 Ba In2 95.576(11) 9_444 . ? 
In1 Ba In2 95.576(11) 9_544 . ? 
In1 Ba In2 45.254(4) 9_454 . ? 
In1 Ba In2 84.424(11) 25_455 . ? 
In1 Ba In2 134.746(4) 25_545 . ? 
Mg2 Ba In2 51.427(8) 25 . ? 
In1 Ba Mg2 45.254(4) 25_445 17 ? 
In1 Ba Mg2 134.746(4) 9_554 17 ? 
In1 Ba Mg2 95.576(11) 25 17 ? 
In1 Ba Mg2 84.424(11) 9_444 17 ? 
In1 Ba Mg2 84.424(11) 9_544 17 ? 
In1 Ba Mg2 134.746(4) 9_454 17 ? 
In1 Ba Mg2 95.576(11) 25_455 17 ? 
In1 Ba Mg2 45.254(4) 25_545 17 ? 
Mg2 Ba Mg2 128.573(9) 25 17 ? 
In2 Ba Mg2 180.0 . 17 ? 
In1 In1 Mg2 124.928(9) 17_556 17_566 ? 
In1 In1 Mg2 124.928(9) 17_556 9_545 ? 
Mg2 In1 Mg2 70.864(9) 17_566 9_545 ? 
In1 In1 In2 124.928(9) 17_556 17_566 ? 
Mg2 In1 In2 0.0 17_566 17_566 ? 
Mg2 In1 In2 70.864(9) 9_545 17_566 ? 
In1 In1 In2 124.928(9) 17_556 9_545 ? 
Mg2 In1 In2 70.864(9) 17_566 9_545 ? 
Mg2 In1 In2 0.0 9_545 9_545 ? 
In2 In1 In2 70.864(9) 17_566 9_545 ? 
In1 In1 Mg2 124.928(9) 17_556 17_556 ? 
Mg2 In1 Mg2 110.145(18) 17_566 17_556 ? 
Mg2 In1 Mg2 70.864(9) 9_545 17_556 ? 
In2 In1 Mg2 110.145(18) 17_566 17_556 ? 
In2 In1 Mg2 70.864(9) 9_545 17_556 ? 
In1 In1 In2 124.928(9) 17_556 9_445 ? 
Mg2 In1 In2 70.864(9) 17_566 9_445 ? 
Mg2 In1 In2 110.145(18) 9_545 9_445 ? 
In2 In1 In2 70.864(9) 17_566 9_445 ? 
In2 In1 In2 110.145(18) 9_545 9_445 ? 
Mg2 In1 In2 70.864(9) 17_556 9_445 ? 
In1 In1 Mg2 124.928(9) 17_556 9_445 ? 
Mg2 In1 Mg2 70.864(9) 17_566 9_445 ? 
Mg2 In1 Mg2 110.145(18) 9_545 9_445 ? 
In2 In1 Mg2 70.864(9) 17_566 9_445 ? 
In2 In1 Mg2 110.145(18) 9_545 9_445 ? 
Mg2 In1 Mg2 70.864(9) 17_556 9_445 ? 
In2 In1 Mg2 0.0 9_445 9_445 ? 
In1 In1 In2 124.928(9) 17_556 17_556 ? 
Mg2 In1 In2 110.145(18) 17_566 17_556 ? 
Mg2 In1 In2 70.864(9) 9_545 17_556 ? 
In2 In1 In2 110.145(18) 17_566 17_556 ? 
In2 In1 In2 70.864(9) 9_545 17_556 ? 
Mg2 In1 In2 0.0 17_556 17_556 ? 
In2 In1 In2 70.864(9) 9_445 17_556 ? 
Mg2 In1 In2 70.864(9) 9_445 17_556 ? 
In1 In1 Ba 67.404(7) 17_556 9_445 ? 
Mg2 In1 Ba 139.045(3) 17_566 9_445 ? 
Mg2 In1 Ba 139.045(3) 9_545 9_445 ? 
In2 In1 Ba 139.045(3) 17_566 9_445 ? 
In2 In1 Ba 139.045(3) 9_545 9_445 ? 
Mg2 In1 Ba 71.624(9) 17_556 9_445 ? 
In2 In1 Ba 71.624(9) 9_445 9_445 ? 
Mg2 In1 Ba 71.624(9) 9_445 9_445 ? 
In2 In1 Ba 71.624(9) 17_556 9_445 ? 
In1 In1 Ba 67.404(7) 17_556 9 ? 
Mg2 In1 Ba 71.624(9) 17_566 9 ? 
Mg2 In1 Ba 71.624(9) 9_545 9 ? 
In2 In1 Ba 71.624(9) 17_566 9 ? 
In2 In1 Ba 71.624(9) 9_545 9 ? 
Mg2 In1 Ba 139.045(4) 17_556 9 ? 
In2 In1 Ba 139.045(4) 9_445 9 ? 
Mg2 In1 Ba 139.045(4) 9_445 9 ? 
In2 In1 Ba 139.045(4) 17_556 9 ? 
Ba In1 Ba 134.808(15) 9_445 9 ? 
In1 In1 Ba 67.404(7) 17_556 9_545 ? 
Mg2 In1 Ba 139.045(4) 17_566 9_545 ? 
Mg2 In1 Ba 71.624(9) 9_545 9_545 ? 
In2 In1 Ba 139.045(4) 17_566 9_545 ? 
In2 In1 Ba 71.624(9) 9_545 9_545 ? 
Mg2 In1 Ba 71.624(9) 17_556 9_545 ? 
In2 In1 Ba 139.045(4) 9_445 9_545 ? 
Mg2 In1 Ba 139.045(4) 9_445 9_545 ? 
In2 In1 Ba 71.624(9) 17_556 9_545 ? 
Ba In1 Ba 81.510(5) 9_445 9_545 ? 
Ba In1 Ba 81.510(5) 9 9_545 ? 
In1 In2 In1 109.136(9) 17_566 9_454 ? 
In1 In2 In1 110.145(18) 17_566 17_556 ? 
In1 In2 In1 109.136(9) 9_454 17_556 ? 
In1 In2 In1 109.136(9) 17_566 9_554 ? 
In1 In2 In1 110.145(18) 9_454 9_554 ? 
In1 In2 In1 109.136(9) 17_556 9_554 ? 
In1 In2 Mg2 54.568(4) 17_566 25_565 ? 
In1 In2 Mg2 125.432(4) 9_454 25_565 ? 
In1 In2 Mg2 125.432(4) 17_556 25_565 ? 
In1 In2 Mg2 54.568(4) 9_554 25_565 ? 
In1 In2 Mg2 125.432(4) 17_566 25_455 ? 
In1 In2 Mg2 54.568(4) 9_454 25_455 ? 
In1 In2 Mg2 54.568(4) 17_556 25_455 ? 
In1 In2 Mg2 125.432(4) 9_554 25_455 ? 
Mg2 In2 Mg2 180.0 25_565 25_455 ? 
In1 In2 Mg2 54.568(4) 17_566 25_465 ? 
In1 In2 Mg2 54.568(4) 9_454 25_465 ? 
In1 In2 Mg2 125.432(4) 17_556 25_465 ? 
In1 In2 Mg2 125.432(4) 9_554 25_465 ? 
Mg2 In2 Mg2 90.0 25_565 25_465 ? 
Mg2 In2 Mg2 90.0 25_455 25_465 ? 
In1 In2 Mg2 125.432(4) 17_566 25 ? 
In1 In2 Mg2 125.432(4) 9_454 25 ? 
In1 In2 Mg2 54.568(4) 17_556 25 ? 
In1 In2 Mg2 54.568(4) 9_554 25 ? 
Mg2 In2 Mg2 90.0 25_565 25 ? 
Mg2 In2 Mg2 90.0 25_455 25 ? 
Mg2 In2 Mg2 180.0 25_465 25 ? 
In1 In2 Ba 162.777(6) 17_566 . ? 
In1 In2 Ba 63.122(9) 9_454 . ? 
In1 In2 Ba 87.078(15) 17_556 . ? 
In1 In2 Ba 63.122(9) 9_554 . ? 
Mg2 In2 Ba 115.714(4) 25_565 . ? 
Mg2 In2 Ba 64.286(4) 25_455 . ? 
Mg2 In2 Ba 115.714(4) 25_465 . ? 
Mg2 In2 Ba 64.286(4) 25 . ? 
In1 In2 Ba 63.122(9) 17_566 9 ? 
In1 In2 Ba 162.777(6) 9_454 9 ? 
In1 In2 Ba 63.122(9) 17_556 9 ? 
In1 In2 Ba 87.078(15) 9_554 9 ? 
Mg2 In2 Ba 64.286(4) 25_565 9 ? 
Mg2 In2 Ba 115.714(4) 25_455 9 ? 
Mg2 In2 Ba 115.714(4) 25_465 9 ? 
Mg2 In2 Ba 64.286(4) 25 9 ? 
Ba In2 Ba 128.573(9) . 9 ? 
In1 In2 Ba 87.078(15) 17_566 1_565 ? 
In1 In2 Ba 63.122(9) 9_454 1_565 ? 
In1 In2 Ba 162.777(6) 17_556 1_565 ? 
In1 In2 Ba 63.122(9) 9_554 1_565 ? 
Mg2 In2 Ba 64.286(4) 25_565 1_565 ? 
Mg2 In2 Ba 115.714(4) 25_455 1_565 ? 
Mg2 In2 Ba 64.286(4) 25_465 1_565 ? 
Mg2 In2 Ba 115.714(4) 25 1_565 ? 
Ba In2 Ba 75.699(14) . 1_565 ? 
Ba In2 Ba 128.573(9) 9 1_565 ? 
In1 In2 Ba 63.122(9) 17_566 9_455 ? 
In1 In2 Ba 87.078(15) 9_454 9_455 ? 
In1 In2 Ba 63.122(9) 17_556 9_455 ? 
In1 In2 Ba 162.777(6) 9_554 9_455 ? 
Mg2 In2 Ba 115.714(4) 25_565 9_455 ? 
Mg2 In2 Ba 64.286(4) 25_455 9_455 ? 
Mg2 In2 Ba 64.286(4) 25_465 9_455 ? 
Mg2 In2 Ba 115.714(4) 25 9_455 ? 
Ba In2 Ba 128.573(9) . 9_455 ? 
Ba In2 Ba 75.699(14) 9 9_455 ? 
Ba In2 Ba 128.573(9) 1_565 9_455 ? 
  
_diffrn_measured_fraction_theta_max    1.000 
_diffrn_reflns_theta_full              27.82 
_diffrn_measured_fraction_theta_full   1.000 
_refine_diff_density_max    0.603 
_refine_diff_density_min   -0.586 
_refine_diff_density_rms    0.132 
#===END  

data_BaMg1.046In2.954 
  
_audit_creation_method            SHELXL-97 
_chemical_name_systematic 
; 
 ? 
; 
_chemical_name_common             ? 
_chemical_melting_point           ? 
_chemical_formula_moiety          ? 
_chemical_formula_sum 
 'Ba In2.95 Mg1.04' 
_chemical_formula_weight          502.04 
  
loop_ 
 _atom_type_symbol 
 _atom_type_description 
 _atom_type_scat_dispersion_real 
 _atom_type_scat_dispersion_imag 
 _atom_type_scat_source 
 'Mg'  'Mg'   0.0486   0.0363 
 'International Tables Vol C Tables 4.2.6.8 and 6.1.1.4' 
 'In'  'In'  -0.7276   1.3100 
 'International Tables Vol C Tables 4.2.6.8 and 6.1.1.4' 
 'Ba'  'Ba'  -0.3244   2.2819 
 'International Tables Vol C Tables 4.2.6.8 and 6.1.1.4' 
  
_symmetry_cell_setting            Tetragonal 
_symmetry_space_group_name_H-M    I4/mmm 
  
loop_ 
 _symmetry_equiv_pos_as_xyz 
 'x, y, z' 
 '-x, -y, z' 
 '-y, x, z' 
 'y, -x, z' 
 '-x, y, -z' 
 'x, -y, -z' 
 'y, x, -z' 
 '-y, -x, -z' 
 'x+1/2, y+1/2, z+1/2' 
 '-x+1/2, -y+1/2, z+1/2' 
 '-y+1/2, x+1/2, z+1/2' 
 'y+1/2, -x+1/2, z+1/2' 
 '-x+1/2, y+1/2, -z+1/2' 
 'x+1/2, -y+1/2, -z+1/2' 
 'y+1/2, x+1/2, -z+1/2' 
 '-y+1/2, -x+1/2, -z+1/2' 
 '-x, -y, -z' 
 'x, y, -z' 
 'y, -x, -z' 
 '-y, x, -z' 
 'x, -y, z' 
 '-x, y, z' 
 '-y, -x, z' 
 'y, x, z' 
 '-x+1/2, -y+1/2, -z+1/2' 
 'x+1/2, y+1/2, -z+1/2' 
 'y+1/2, -x+1/2, -z+1/2' 
 '-y+1/2, x+1/2, -z+1/2' 
 'x+1/2, -y+1/2, z+1/2' 
 '-x+1/2, y+1/2, z+1/2' 
 '-y+1/2, -x+1/2, z+1/2' 
 'y+1/2, x+1/2, z+1/2' 
  
_cell_length_a                    4.833(2) 
_cell_length_b                    4.833(2) 
_cell_length_c                    12.478(10) 
_cell_angle_alpha                 90.00 
_cell_angle_beta                  90.00 
_cell_angle_gamma                 90.00 
_cell_volume                      291.5(3) 
_cell_formula_units_Z             2 
_cell_measurement_temperature     296(2) 
_cell_measurement_reflns_used     1527 
_cell_measurement_theta_min       3.27 
_cell_measurement_theta_max       28.14 
  
_exptl_crystal_description        irregular 
_exptl_crystal_colour             silver 
_exptl_crystal_size_max           0.18 
_exptl_crystal_size_mid           0.13 
_exptl_crystal_size_min           0.10 
_exptl_crystal_density_meas       'not measured' 
_exptl_crystal_density_diffrn     5.719 
_exptl_crystal_density_method     'not measured' 
_exptl_crystal_F_000              427 
_exptl_absorpt_coefficient_mu     18.152 
_exptl_absorpt_correction_type    empirical 
_exptl_absorpt_correction_T_min   0.1560 
_exptl_absorpt_correction_T_max   0.3696 
_exptl_absorpt_process_details    ? 
  
_exptl_special_details 
; 
 ? 
; 
  
_diffrn_ambient_temperature       296(2) 
_diffrn_radiation_wavelength      0.71073 
_diffrn_radiation_type            MoK\a 
_diffrn_radiation_source          'fine-focus sealed tube' 
_diffrn_radiation_monochromator   graphite 
_diffrn_measurement_device_type   'CCD area detector' 
_diffrn_measurement_method        'phi and omega scans' 
_diffrn_detector_area_resol_mean  ? 
_diffrn_standards_number          ? 
_diffrn_standards_interval_count  ? 
_diffrn_standards_interval_time   ? 
_diffrn_standards_decay_%         ? 
_diffrn_reflns_number             1680 
_diffrn_reflns_av_R_equivalents   0.0535 
_diffrn_reflns_av_sigmaI/netI     0.0180 
_diffrn_reflns_limit_h_min        -6 
_diffrn_reflns_limit_h_max        6 
_diffrn_reflns_limit_k_min        -6 
_diffrn_reflns_limit_k_max        6 
_diffrn_reflns_limit_l_min        -15 
_diffrn_reflns_limit_l_max        16 
_diffrn_reflns_theta_min          3.27 
_diffrn_reflns_theta_max          28.14 
_reflns_number_total              134 
_reflns_number_gt                 133 
_reflns_threshold_expression      >2sigma(I) 
  
_computing_data_collection        'Bruker SMART' 
_computing_cell_refinement        'Bruker SMART' 
_computing_data_reduction         'Bruker SAINT' 
_computing_structure_solution     'SHELXS-97 (Sheldrick, 1990)' 
_computing_structure_refinement   'SHELXL-97 (Sheldrick, 1997)' 
_computing_molecular_graphics     'Bruker SHELXTL' 
_computing_publication_material   'Bruker SHELXTL' 
  
_refine_special_details 
; 
 Refinement of F^2^ against ALL reflections.  The weighted R-factor wR and 
 goodness of fit S are based on F^2^, conventional R-factors R are based 
 on F, with F set to zero for negative F^2^. The threshold expression of 
 F^2^ > 2sigma(F^2^) is used only for calculating R-factors(gt) etc. and is 
 not relevant to the choice of reflections for refinement.  R-factors based 
 on F^2^ are statistically about twice as large as those based on F, and R- 
 factors based on ALL data will be even larger. 
; 
  
_refine_ls_structure_factor_coef  Fsqd 
_refine_ls_matrix_type            full 
_refine_ls_weighting_scheme       calc 
_refine_ls_weighting_details 
 'calc w=1/[\s^2^(Fo^2^)+(0.0159P)^2^+0.3426P] where P=(Fo^2^+2Fc^2^)/3' 
_atom_sites_solution_primary      direct 
_atom_sites_solution_secondary    difmap 
_atom_sites_solution_hydrogens    '.' 
_refine_ls_hydrogen_treatment     '.' 
_refine_ls_extinction_method      SHELXL 
_refine_ls_extinction_coef        0.0089(8) 
_refine_ls_extinction_expression 
 'Fc^*^=kFc[1+0.001xFc^2^\l^3^/sin(2\q)]^-1/4^' 
_refine_ls_number_reflns          134 
_refine_ls_number_parameters      10 
_refine_ls_number_restraints      0 
_refine_ls_R_factor_all           0.0150 
_refine_ls_R_factor_gt            0.0150 
_refine_ls_wR_factor_ref          0.0348 
_refine_ls_wR_factor_gt           0.0348 
_refine_ls_goodness_of_fit_ref    1.283 
_refine_ls_restrained_S_all       1.283 
_refine_ls_shift/su_max           0.000 
_refine_ls_shift/su_mean          0.000 
  
loop_ 
 _atom_site_label 
 _atom_site_type_symbol 
 _atom_site_fract_x 
 _atom_site_fract_y 
 _atom_site_fract_z 
 _atom_site_U_iso_or_equiv 
 _atom_site_adp_type 
 _atom_site_occupancy 
 _atom_site_symmetry_multiplicity 
 _atom_site_calc_flag 
 _atom_site_refinement_flags 
 _atom_site_disorder_assembly 
 _atom_site_disorder_group 
Ba Ba 0.0000 0.0000 0.0000 0.0156(2) Uani 1 16 d S . . 
In1 In 0.0000 0.0000 0.61401(3) 0.0170(2) Uani 1 8 d S . . 
In2 In 0.0000 0.5000 0.2500 0.0184(3) Uani 0.477(3) 8 d SP . . 
Mg2 Mg 0.0000 0.5000 0.2500 0.0184(3) Uani 0.523(3) 8 d SP . . 
  
loop_ 
 _atom_site_aniso_label 
 _atom_site_aniso_U_11 
 _atom_site_aniso_U_22 
 _atom_site_aniso_U_33 
 _atom_site_aniso_U_23 
 _atom_site_aniso_U_13 
 _atom_site_aniso_U_12 
Ba 0.0135(2) 0.0135(2) 0.0199(3) 0.000 0.000 0.000 
In1 0.0180(2) 0.0180(2) 0.0151(3) 0.000 0.000 0.000 
In2 0.0194(3) 0.0194(3) 0.0165(4) 0.000 0.000 0.000 
Mg2 0.0194(3) 0.0194(3) 0.0165(4) 0.000 0.000 0.000 
  
_geom_special_details 
; 
 All esds (except the esd in the dihedral angle between two l.s. planes) 
 are estimated using the full covariance matrix.  The cell esds are taken 
 into account individually in the estimation of esds in distances, angles 
 and torsion angles; correlations between esds in cell parameters are only 
 used when they are defined by crystal symmetry.  An approximate (isotropic) 
 treatment of cell esds is used for estimating esds involving l.s. planes. 
; 
  
loop_ 
 _geom_bond_atom_site_label_1 
 _geom_bond_atom_site_label_2 
 _geom_bond_distance 
 _geom_bond_site_symmetry_2 
 _geom_bond_publ_flag 
Ba In1 3.7021(14) 25_445 ? 
Ba In1 3.7021(14) 9_554 ? 
Ba In1 3.7021(14) 25 ? 
Ba In1 3.7021(14) 9_444 ? 
Ba In1 3.7021(14) 25_455 ? 
Ba In1 3.7021(14) 25_545 ? 
Ba In1 3.7021(14) 9_454 ? 
Ba In1 3.7021(14) 9_544 ? 
Ba Mg2 3.946(2) 25 ? 
Ba Mg2 3.946(2) 17 ? 
Ba In2 3.946(2) . ? 
In1 In1 2.845(2) 17_556 ? 
In1 Mg2 2.9530(12) 17_566 ? 
In1 Mg2 2.9530(12) 9_545 ? 
In1 In2 2.9530(12) 17_566 ? 
In1 In2 2.9530(12) 9_545 ? 
In1 Mg2 2.9530(12) 17_556 ? 
In1 In2 2.9530(12) 9_445 ? 
In1 Mg2 2.9530(12) 9_445 ? 
In1 In2 2.9530(12) 17_556 ? 
In1 Ba 3.7021(14) 9_445 ? 
In1 Ba 3.7021(14) 9 ? 
In1 Ba 3.7021(14) 9_545 ? 
In2 In1 2.9530(12) 17_566 ? 
In2 In1 2.9530(12) 9_454 ? 
In2 In1 2.9530(12) 17_556 ? 
In2 In1 2.9530(12) 9_554 ? 
In2 Mg2 3.4178(14) 25_565 ? 
In2 Mg2 3.4178(14) 25_455 ? 
In2 Mg2 3.4178(14) 25_465 ? 
In2 Mg2 3.4178(14) 25 ? 
In2 Ba 3.946(2) 9 ? 
In2 Ba 3.946(2) 1_565 ? 
In2 Ba 3.946(2) 9_455 ? 
  
loop_ 
 _geom_angle_atom_site_label_1 
 _geom_angle_atom_site_label_2 
 _geom_angle_atom_site_label_3 
 _geom_angle 
 _geom_angle_site_symmetry_1 
 _geom_angle_site_symmetry_3 
 _geom_angle_publ_flag 
In1 Ba In1 180.000(11) 25_445 9_554 ? 
In1 Ba In1 134.80(4) 25_445 25 ? 
In1 Ba In1 45.20(4) 9_554 25 ? 
In1 Ba In1 45.20(4) 25_445 9_444 ? 
In1 Ba In1 134.80(4) 9_554 9_444 ? 
In1 Ba In1 180.000(11) 25 9_444 ? 
In1 Ba In1 81.507(14) 25_445 25_455 ? 
In1 Ba In1 98.493(14) 9_554 25_455 ? 
In1 Ba In1 81.507(14) 25 25_455 ? 
In1 Ba In1 98.493(14) 9_444 25_455 ? 
In1 Ba In1 81.507(14) 25_445 25_545 ? 
In1 Ba In1 98.493(14) 9_554 25_545 ? 
In1 Ba In1 81.507(14) 25 25_545 ? 
In1 Ba In1 98.493(14) 9_444 25_545 ? 
In1 Ba In1 134.80(4) 25_455 25_545 ? 
In1 Ba In1 98.493(14) 25_445 9_454 ? 
In1 Ba In1 81.507(14) 9_554 9_454 ? 
In1 Ba In1 98.493(14) 25 9_454 ? 
In1 Ba In1 81.507(14) 9_444 9_454 ? 
In1 Ba In1 45.20(4) 25_455 9_454 ? 
In1 Ba In1 180.000(11) 25_545 9_454 ? 
In1 Ba In1 98.493(14) 25_445 9_544 ? 
In1 Ba In1 81.507(14) 9_554 9_544 ? 
In1 Ba In1 98.493(14) 25 9_544 ? 
In1 Ba In1 81.507(14) 9_444 9_544 ? 
In1 Ba In1 180.000(11) 25_455 9_544 ? 
In1 Ba In1 45.20(4) 25_545 9_544 ? 
In1 Ba In1 134.80(4) 9_454 9_544 ? 
In1 Ba Mg2 134.716(6) 25_445 25 ? 
In1 Ba Mg2 45.284(7) 9_554 25 ? 
In1 Ba Mg2 84.49(4) 25 25 ? 
In1 Ba Mg2 95.51(4) 9_444 25 ? 
In1 Ba Mg2 134.716(7) 25_455 25 ? 
In1 Ba Mg2 84.49(4) 25_545 25 ? 
In1 Ba Mg2 95.51(4) 9_454 25 ? 
In1 Ba Mg2 45.284(7) 9_544 25 ? 
In1 Ba Mg2 45.284(7) 25_445 17 ? 
In1 Ba Mg2 134.716(6) 9_554 17 ? 
In1 Ba Mg2 95.51(4) 25 17 ? 
In1 Ba Mg2 84.49(4) 9_444 17 ? 
In1 Ba Mg2 95.51(4) 25_455 17 ? 
In1 Ba Mg2 45.284(7) 25_545 17 ? 
In1 Ba Mg2 134.716(7) 9_454 17 ? 
In1 Ba Mg2 84.49(4) 9_544 17 ? 
Mg2 Ba Mg2 128.68(3) 25 17 ? 
In1 Ba In2 134.716(6) 25_445 . ? 
In1 Ba In2 45.284(7) 9_554 . ? 
In1 Ba In2 84.49(4) 25 . ? 
In1 Ba In2 95.51(4) 9_444 . ? 
In1 Ba In2 84.49(4) 25_455 . ? 
In1 Ba In2 134.716(7) 25_545 . ? 
In1 Ba In2 45.284(7) 9_454 . ? 
In1 Ba In2 95.51(4) 9_544 . ? 
Mg2 Ba In2 51.32(3) 25 . ? 
Mg2 Ba In2 180.0 17 . ? 
In1 In1 Mg2 125.07(3) 17_556 17_566 ? 
In1 In1 Mg2 125.07(3) 17_556 9_545 ? 
Mg2 In1 Mg2 70.72(3) 17_566 9_545 ? 
In1 In1 In2 125.07(3) 17_556 17_566 ? 
Mg2 In1 In2 0.0 17_566 17_566 ? 
Mg2 In1 In2 70.72(3) 9_545 17_566 ? 
In1 In1 In2 125.07(3) 17_556 9_545 ? 
Mg2 In1 In2 70.72(3) 17_566 9_545 ? 
Mg2 In1 In2 0.0 9_545 9_545 ? 
In2 In1 In2 70.72(3) 17_566 9_545 ? 
In1 In1 Mg2 125.07(3) 17_556 17_556 ? 
Mg2 In1 Mg2 109.85(5) 17_566 17_556 ? 
Mg2 In1 Mg2 70.72(3) 9_545 17_556 ? 
In2 In1 Mg2 109.85(5) 17_566 17_556 ? 
In2 In1 Mg2 70.72(3) 9_545 17_556 ? 
In1 In1 In2 125.07(3) 17_556 9_445 ? 
Mg2 In1 In2 70.72(3) 17_566 9_445 ? 
Mg2 In1 In2 109.85(5) 9_545 9_445 ? 
In2 In1 In2 70.72(3) 17_566 9_445 ? 
In2 In1 In2 109.85(5) 9_545 9_445 ? 
Mg2 In1 In2 70.72(3) 17_556 9_445 ? 
In1 In1 Mg2 125.07(3) 17_556 9_445 ? 
Mg2 In1 Mg2 70.72(3) 17_566 9_445 ? 
Mg2 In1 Mg2 109.85(5) 9_545 9_445 ? 
In2 In1 Mg2 70.72(3) 17_566 9_445 ? 
In2 In1 Mg2 109.85(5) 9_545 9_445 ? 
Mg2 In1 Mg2 70.72(3) 17_556 9_445 ? 
In2 In1 Mg2 0.0 9_445 9_445 ? 
In1 In1 In2 125.07(3) 17_556 17_556 ? 
Mg2 In1 In2 109.85(5) 17_566 17_556 ? 
Mg2 In1 In2 70.72(3) 9_545 17_556 ? 
In2 In1 In2 109.85(5) 17_566 17_556 ? 
In2 In1 In2 70.72(3) 9_545 17_556 ? 
Mg2 In1 In2 0.0 17_556 17_556 ? 
In2 In1 In2 70.72(3) 9_445 17_556 ? 
Mg2 In1 In2 70.72(3) 9_445 17_556 ? 
In1 In1 Ba 67.40(2) 17_556 9_445 ? 
Mg2 In1 Ba 139.034(7) 17_566 9_445 ? 
Mg2 In1 Ba 139.034(7) 9_545 9_445 ? 
In2 In1 Ba 139.034(7) 17_566 9_445 ? 
In2 In1 Ba 139.034(7) 9_545 9_445 ? 
Mg2 In1 Ba 71.73(3) 17_556 9_445 ? 
In2 In1 Ba 71.73(3) 9_445 9_445 ? 
Mg2 In1 Ba 71.73(3) 9_445 9_445 ? 
In2 In1 Ba 71.73(3) 17_556 9_445 ? 
In1 In1 Ba 67.400(19) 17_556 9 ? 
Mg2 In1 Ba 71.73(3) 17_566 9 ? 
Mg2 In1 Ba 71.73(3) 9_545 9 ? 
In2 In1 Ba 71.73(3) 17_566 9 ? 
In2 In1 Ba 71.73(3) 9_545 9 ? 
Mg2 In1 Ba 139.034(7) 17_556 9 ? 
In2 In1 Ba 139.034(7) 9_445 9 ? 
Mg2 In1 Ba 139.034(7) 9_445 9 ? 
In2 In1 Ba 139.034(7) 17_556 9 ? 
Ba In1 Ba 134.80(4) 9_445 9 ? 
In1 In1 Ba 67.400(19) 17_556 9_545 ? 
Mg2 In1 Ba 139.034(7) 17_566 9_545 ? 
Mg2 In1 Ba 71.73(3) 9_545 9_545 ? 
In2 In1 Ba 139.034(7) 17_566 9_545 ? 
In2 In1 Ba 71.73(3) 9_545 9_545 ? 
Mg2 In1 Ba 71.73(3) 17_556 9_545 ? 
In2 In1 Ba 139.034(7) 9_445 9_545 ? 
Mg2 In1 Ba 139.034(7) 9_445 9_545 ? 
In2 In1 Ba 71.73(3) 17_556 9_545 ? 
Ba In1 Ba 81.507(14) 9_445 9_545 ? 
Ba In1 Ba 81.507(14) 9 9_545 ? 
In1 In2 In1 109.28(3) 17_566 9_454 ? 
In1 In2 In1 109.85(5) 17_566 17_556 ? 
In1 In2 In1 109.28(3) 9_454 17_556 ? 
In1 In2 In1 109.28(3) 17_566 9_554 ? 
In1 In2 In1 109.85(5) 9_454 9_554 ? 
In1 In2 In1 109.28(3) 17_556 9_554 ? 
In1 In2 Mg2 54.641(13) 17_566 25_565 ? 
In1 In2 Mg2 125.359(13) 9_454 25_565 ? 
In1 In2 Mg2 125.359(13) 17_556 25_565 ? 
In1 In2 Mg2 54.641(13) 9_554 25_565 ? 
In1 In2 Mg2 125.359(13) 17_566 25_455 ? 
In1 In2 Mg2 54.641(13) 9_454 25_455 ? 
In1 In2 Mg2 54.641(13) 17_556 25_455 ? 
In1 In2 Mg2 125.359(13) 9_554 25_455 ? 
Mg2 In2 Mg2 180.0 25_565 25_455 ? 
In1 In2 Mg2 54.641(13) 17_566 25_465 ? 
In1 In2 Mg2 54.641(13) 9_454 25_465 ? 
In1 In2 Mg2 125.359(13) 17_556 25_465 ? 
In1 In2 Mg2 125.359(13) 9_554 25_465 ? 
Mg2 In2 Mg2 90.0 25_565 25_465 ? 
Mg2 In2 Mg2 90.0 25_455 25_465 ? 
In1 In2 Mg2 125.359(13) 17_566 25 ? 
In1 In2 Mg2 125.359(13) 9_454 25 ? 
In1 In2 Mg2 54.641(13) 17_556 25 ? 
In1 In2 Mg2 54.641(13) 9_554 25 ? 
Mg2 In2 Mg2 90.0 25_565 25 ? 
Mg2 In2 Mg2 90.0 25_455 25 ? 
Mg2 In2 Mg2 180.0 25_465 25 ? 
In1 In2 Ba 162.839(6) 17_566 . ? 
In1 In2 Ba 62.98(3) 9_454 . ? 
In1 In2 Ba 87.31(5) 17_556 . ? 
In1 In2 Ba 62.98(3) 9_554 . ? 
Mg2 In2 Ba 115.661(16) 25_565 . ? 
Mg2 In2 Ba 64.339(16) 25_455 . ? 
Mg2 In2 Ba 115.661(16) 25_465 . ? 
Mg2 In2 Ba 64.339(16) 25 . ? 
In1 In2 Ba 62.98(3) 17_566 9 ? 
In1 In2 Ba 162.839(6) 9_454 9 ? 
In1 In2 Ba 62.98(3) 17_556 9 ? 
In1 In2 Ba 87.31(5) 9_554 9 ? 
Mg2 In2 Ba 64.339(16) 25_565 9 ? 
Mg2 In2 Ba 115.661(16) 25_455 9 ? 
Mg2 In2 Ba 115.661(16) 25_465 9 ? 
Mg2 In2 Ba 64.339(16) 25 9 ? 
Ba In2 Ba 128.68(3) . 9 ? 
In1 In2 Ba 87.31(5) 17_566 1_565 ? 
In1 In2 Ba 62.98(3) 9_454 1_565 ? 
In1 In2 Ba 162.839(6) 17_556 1_565 ? 
In1 In2 Ba 62.98(3) 9_554 1_565 ? 
Mg2 In2 Ba 64.339(16) 25_565 1_565 ? 
Mg2 In2 Ba 115.661(16) 25_455 1_565 ? 
Mg2 In2 Ba 64.339(16) 25_465 1_565 ? 
Mg2 In2 Ba 115.661(16) 25 1_565 ? 
Ba In2 Ba 75.53(5) . 1_565 ? 
Ba In2 Ba 128.68(3) 9 1_565 ? 
In1 In2 Ba 62.98(3) 17_566 9_455 ? 
In1 In2 Ba 87.31(5) 9_454 9_455 ? 
In1 In2 Ba 62.98(3) 17_556 9_455 ? 
In1 In2 Ba 162.839(6) 9_554 9_455 ? 
Mg2 In2 Ba 115.661(16) 25_565 9_455 ? 
Mg2 In2 Ba 64.339(16) 25_455 9_455 ? 
Mg2 In2 Ba 64.339(16) 25_465 9_455 ? 
Mg2 In2 Ba 115.661(16) 25 9_455 ? 
Ba In2 Ba 128.68(3) . 9_455 ? 
Ba In2 Ba 75.53(5) 9 9_455 ? 
Ba In2 Ba 128.68(3) 1_565 9_455 ? 
  
_diffrn_measured_fraction_theta_max    0.993 
_diffrn_reflns_theta_full              28.14 
_diffrn_measured_fraction_theta_full   0.993 
_refine_diff_density_max    0.660 
_refine_diff_density_min   -0.965 
_refine_diff_density_rms    0.282 
#===END
  
data_BaZn0.79In3.21 
  
_audit_creation_method            SHELXL-97 
_chemical_name_systematic 
; 
 ? 
; 
_chemical_name_common             ? 
_chemical_melting_point           ? 
_chemical_formula_moiety          ? 
_chemical_formula_sum 
 'Ba In3.21 Zn0.79' 
_chemical_formula_weight          557.80 
  
loop_ 
 _atom_type_symbol 
 _atom_type_description 
 _atom_type_scat_dispersion_real 
 _atom_type_scat_dispersion_imag 
 _atom_type_scat_source 
 'Zn'  'Zn'   0.2839   1.4301 
 'International Tables Vol C Tables 4.2.6.8 and 6.1.1.4' 
 'In'  'In'  -0.7276   1.3100 
 'International Tables Vol C Tables 4.2.6.8 and 6.1.1.4' 
 'Ba'  'Ba'  -0.3244   2.2819 
 'International Tables Vol C Tables 4.2.6.8 and 6.1.1.4' 
  
_symmetry_cell_setting            Tetragonal 
_symmetry_space_group_name_H-M    I4/mmm 
  
loop_ 
 _symmetry_equiv_pos_as_xyz 
 'x, y, z' 
 '-x, -y, z' 
 '-y, x, z' 
 'y, -x, z' 
 '-x, y, -z' 
 'x, -y, -z' 
 'y, x, -z' 
 '-y, -x, -z' 
 'x+1/2, y+1/2, z+1/2' 
 '-x+1/2, -y+1/2, z+1/2' 
 '-y+1/2, x+1/2, z+1/2' 
 'y+1/2, -x+1/2, z+1/2' 
 '-x+1/2, y+1/2, -z+1/2' 
 'x+1/2, -y+1/2, -z+1/2' 
 'y+1/2, x+1/2, -z+1/2' 
 '-y+1/2, -x+1/2, -z+1/2' 
 '-x, -y, -z' 
 'x, y, -z' 
 'y, -x, -z' 
 '-y, x, -z' 
 'x, -y, z' 
 '-x, y, z' 
 '-y, -x, z' 
 'y, x, z' 
 '-x+1/2, -y+1/2, -z+1/2' 
 'x+1/2, y+1/2, -z+1/2' 
 'y+1/2, -x+1/2, -z+1/2' 
 '-y+1/2, x+1/2, -z+1/2' 
 'x+1/2, -y+1/2, z+1/2' 
 '-x+1/2, y+1/2, z+1/2' 
 '-y+1/2, -x+1/2, z+1/2' 
 'y+1/2, x+1/2, z+1/2' 
  
_cell_length_a                    4.7827(8) 
_cell_length_b                    4.7827(8) 
_cell_length_c                    12.007(4) 
_cell_angle_alpha                 90.00 
_cell_angle_beta                  90.00 
_cell_angle_gamma                 90.00 
_cell_volume                      274.65(11) 
_cell_formula_units_Z             2 
_cell_measurement_temperature     296(2) 
_cell_measurement_reflns_used     1177 
_cell_measurement_theta_min       3.39 
_cell_measurement_theta_max       28.03 
  
_exptl_crystal_description        irregular 
_exptl_crystal_colour             silver 
_exptl_crystal_size_max           0.17 
_exptl_crystal_size_mid           0.12 
_exptl_crystal_size_min           0.10 
_exptl_crystal_density_meas       'not measured' 
_exptl_crystal_density_diffrn     6.745 
_exptl_crystal_density_method     'not measured' 
_exptl_crystal_F_000              474 
_exptl_absorpt_coefficient_mu     23.558 
_exptl_absorpt_correction_type    empirical 
_exptl_absorpt_correction_T_min   0.1342 
_exptl_absorpt_correction_T_max   0.4351 
_exptl_absorpt_process_details    ? 
  
_exptl_special_details 
; 
 ? 
; 
  
_diffrn_ambient_temperature       296(2) 
_diffrn_radiation_wavelength      0.71073 
_diffrn_radiation_type            MoK\a 
_diffrn_radiation_source          'fine-focus sealed tube' 
_diffrn_radiation_monochromator   graphite 
_diffrn_measurement_device_type   'CCD area detector' 
_diffrn_measurement_method        'phi and omega scans' 
_diffrn_detector_area_resol_mean  ? 
_diffrn_standards_number          ? 
_diffrn_standards_interval_count  ? 
_diffrn_standards_interval_time   ? 
_diffrn_standards_decay_%         ? 
_diffrn_reflns_number             1544 
_diffrn_reflns_av_R_equivalents   0.0776 
_diffrn_reflns_av_sigmaI/netI     0.0239 
_diffrn_reflns_limit_h_min        -6 
_diffrn_reflns_limit_h_max        6 
_diffrn_reflns_limit_k_min        -6 
_diffrn_reflns_limit_k_max        6 
_diffrn_reflns_limit_l_min        -15 
_diffrn_reflns_limit_l_max        15 
_diffrn_reflns_theta_min          3.39 
_diffrn_reflns_theta_max          28.27 
_reflns_number_total              125 
_reflns_number_gt                 121 
_reflns_threshold_expression      >2sigma(I) 
  
_computing_data_collection        'Bruker SMART' 
_computing_cell_refinement        'Bruker SMART' 
_computing_data_reduction         'Bruker SAINT' 
_computing_structure_solution     'SHELXS-97 (Sheldrick, 1990)' 
_computing_structure_refinement   'SHELXL-97 (Sheldrick, 1997)' 
_computing_molecular_graphics     'Bruker SHELXTL' 
_computing_publication_material   'Bruker SHELXTL' 
  
_refine_special_details 
; 
 Refinement of F^2^ against ALL reflections.  The weighted R-factor wR and 
 goodness of fit S are based on F^2^, conventional R-factors R are based 
 on F, with F set to zero for negative F^2^. The threshold expression of 
 F^2^ > 2sigma(F^2^) is used only for calculating R-factors(gt) etc. and is 
 not relevant to the choice of reflections for refinement.  R-factors based 
 on F^2^ are statistically about twice as large as those based on F, and R- 
 factors based on ALL data will be even larger. 
; 
  
_refine_ls_structure_factor_coef  Fsqd 
_refine_ls_matrix_type            full 
_refine_ls_weighting_scheme       calc 
_refine_ls_weighting_details 
 'calc w=1/[\s^2^(Fo^2^)+(0.0000P)^2^+1.3075P] where P=(Fo^2^+2Fc^2^)/3' 
_atom_sites_solution_primary      direct 
_atom_sites_solution_secondary    difmap 
_atom_sites_solution_hydrogens    '.' 
_refine_ls_hydrogen_treatment     '.' 
_refine_ls_extinction_method      SHELXL 
_refine_ls_extinction_coef        0.0031(4) 
_refine_ls_extinction_expression 
 'Fc^*^=kFc[1+0.001xFc^2^\l^3^/sin(2\q)]^-1/4^' 
_refine_ls_number_reflns          125 
_refine_ls_number_parameters      10 
_refine_ls_number_restraints      0 
_refine_ls_R_factor_all           0.0161 
_refine_ls_R_factor_gt            0.0154 
_refine_ls_wR_factor_ref          0.0347 
_refine_ls_wR_factor_gt           0.0344 
_refine_ls_goodness_of_fit_ref    1.158 
_refine_ls_restrained_S_all       1.158 
_refine_ls_shift/su_max           0.000 
_refine_ls_shift/su_mean          0.000 
  
loop_ 
 _atom_site_label 
 _atom_site_type_symbol 
 _atom_site_fract_x 
 _atom_site_fract_y 
 _atom_site_fract_z 
 _atom_site_U_iso_or_equiv 
 _atom_site_adp_type 
 _atom_site_occupancy 
 _atom_site_symmetry_multiplicity 
 _atom_site_calc_flag 
 _atom_site_refinement_flags 
 _atom_site_disorder_assembly 
 _atom_site_disorder_group 
Ba Ba 0.0000 0.0000 0.0000 0.0152(2) Uani 1 16 d S . . 
In1 In 0.0000 0.0000 0.61184(5) 0.0187(3) Uani 0.607(9) 8 d SP . . 
Zn1 Zn 0.0000 0.0000 0.61184(5) 0.0187(3) Uani 0.393(9) 8 d SP . . 
In2 In 0.0000 0.5000 0.2500 0.0214(2) Uani 1 8 d S . . 
  
loop_ 
 _atom_site_aniso_label 
 _atom_site_aniso_U_11 
 _atom_site_aniso_U_22 
 _atom_site_aniso_U_33 
 _atom_site_aniso_U_23 
 _atom_site_aniso_U_13 
 _atom_site_aniso_U_12 
Ba 0.0140(3) 0.0140(3) 0.0176(3) 0.000 0.000 0.000 
In1 0.0190(3) 0.0190(3) 0.0181(4) 0.000 0.000 0.000 
Zn1 0.0190(3) 0.0190(3) 0.0181(4) 0.000 0.000 0.000 
In2 0.0207(3) 0.0207(3) 0.0227(3) 0.000 0.000 0.000 
  
_geom_special_details 
; 
 All esds (except the esd in the dihedral angle between two l.s. planes) 
 are estimated using the full covariance matrix.  The cell esds are taken 
 into account individually in the estimation of esds in distances, angles 
 and torsion angles; correlations between esds in cell parameters are only 
 used when they are defined by crystal symmetry.  An approximate (isotropic) 
 treatment of cell esds is used for estimating esds involving l.s. planes. 
; 
  
loop_ 
 _geom_bond_atom_site_label_1 
 _geom_bond_atom_site_label_2 
 _geom_bond_distance 
 _geom_bond_site_symmetry_2 
 _geom_bond_publ_flag 
Ba Zn1 3.6387(6) 25_445 ? 
Ba Zn1 3.6387(6) 9_554 ? 
Ba In1 3.6387(6) 25_445 ? 
Ba In1 3.6387(6) 9_554 ? 
Ba Zn1 3.6387(6) 25 ? 
Ba Zn1 3.6387(6) 9_444 ? 
Ba In1 3.6387(6) 9_444 ? 
Ba In1 3.6387(6) 25 ? 
Ba Zn1 3.6387(6) 25_455 ? 
Ba Zn1 3.6387(6) 25_545 ? 
Ba Zn1 3.6387(6) 9_454 ? 
Ba In1 3.6387(6) 25_545 ? 
In1 Zn1 2.6857(15) 17_556 ? 
In1 In1 2.6857(15) 17_556 ? 
In1 In2 2.9104(6) 17_566 ? 
In1 In2 2.9104(6) 9_545 ? 
In1 In2 2.9104(6) 17_556 ? 
In1 In2 2.9104(6) 9_445 ? 
In1 Ba 3.6387(6) 9_445 ? 
In1 Ba 3.6387(6) 9 ? 
In1 Ba 3.6387(6) 9_455 ? 
In1 Ba 3.6387(6) 9_545 ? 
In2 Zn1 2.9104(6) 17_566 ? 
In2 Zn1 2.9104(6) 9_454 ? 
In2 In1 2.9104(6) 17_566 ? 
In2 In1 2.9104(6) 9_454 ? 
In2 Zn1 2.9104(6) 17_556 ? 
In2 Zn1 2.9104(6) 9_554 ? 
In2 In1 2.9104(6) 9_554 ? 
In2 In1 2.9104(6) 17_556 ? 
In2 Ba 3.8378(8) 9 ? 
In2 Ba 3.8378(8) 1_565 ? 
In2 Ba 3.8378(8) 9_455 ? 
  
loop_ 
 _geom_angle_atom_site_label_1 
 _geom_angle_atom_site_label_2 
 _geom_angle_atom_site_label_3 
 _geom_angle 
 _geom_angle_site_symmetry_1 
 _geom_angle_site_symmetry_3 
 _geom_angle_publ_flag 
Zn1 Ba Zn1 180.000(18) 25_445 9_554 ? 
Zn1 Ba In1 0.000(18) 25_445 25_445 ? 
Zn1 Ba In1 180.000(18) 9_554 25_445 ? 
Zn1 Ba In1 180.000(18) 25_445 9_554 ? 
Zn1 Ba In1 0.000(18) 9_554 9_554 ? 
In1 Ba In1 180.000(18) 25_445 9_554 ? 
Zn1 Ba Zn1 136.69(2) 25_445 25 ? 
Zn1 Ba Zn1 43.31(2) 9_554 25 ? 
In1 Ba Zn1 136.69(2) 25_445 25 ? 
In1 Ba Zn1 43.31(2) 9_554 25 ? 
Zn1 Ba Zn1 43.31(2) 25_445 9_444 ? 
Zn1 Ba Zn1 136.69(2) 9_554 9_444 ? 
In1 Ba Zn1 43.31(2) 25_445 9_444 ? 
In1 Ba Zn1 136.69(2) 9_554 9_444 ? 
Zn1 Ba Zn1 180.000(18) 25 9_444 ? 
Zn1 Ba In1 43.31(2) 25_445 9_444 ? 
Zn1 Ba In1 136.69(2) 9_554 9_444 ? 
In1 Ba In1 43.31(2) 25_445 9_444 ? 
In1 Ba In1 136.69(2) 9_554 9_444 ? 
Zn1 Ba In1 180.000(18) 25 9_444 ? 
Zn1 Ba In1 0.000(18) 9_444 9_444 ? 
Zn1 Ba In1 136.69(2) 25_445 25 ? 
Zn1 Ba In1 43.31(2) 9_554 25 ? 
In1 Ba In1 136.69(2) 25_445 25 ? 
In1 Ba In1 43.31(2) 9_554 25 ? 
Zn1 Ba In1 0.000(18) 25 25 ? 
Zn1 Ba In1 180.000(18) 9_444 25 ? 
In1 Ba In1 180.000(18) 9_444 25 ? 
Zn1 Ba Zn1 82.172(8) 25_445 25_455 ? 
Zn1 Ba Zn1 97.828(8) 9_554 25_455 ? 
In1 Ba Zn1 82.172(8) 25_445 25_455 ? 
In1 Ba Zn1 97.828(8) 9_554 25_455 ? 
Zn1 Ba Zn1 82.172(8) 25 25_455 ? 
Zn1 Ba Zn1 97.828(8) 9_444 25_455 ? 
In1 Ba Zn1 97.828(8) 9_444 25_455 ? 
In1 Ba Zn1 82.172(8) 25 25_455 ? 
Zn1 Ba Zn1 82.172(8) 25_445 25_545 ? 
Zn1 Ba Zn1 97.828(8) 9_554 25_545 ? 
In1 Ba Zn1 82.172(8) 25_445 25_545 ? 
In1 Ba Zn1 97.828(8) 9_554 25_545 ? 
Zn1 Ba Zn1 82.172(8) 25 25_545 ? 
Zn1 Ba Zn1 97.828(8) 9_444 25_545 ? 
In1 Ba Zn1 97.828(8) 9_444 25_545 ? 
In1 Ba Zn1 82.172(8) 25 25_545 ? 
Zn1 Ba Zn1 136.69(2) 25_455 25_545 ? 
Zn1 Ba Zn1 97.828(8) 25_445 9_454 ? 
Zn1 Ba Zn1 82.172(8) 9_554 9_454 ? 
In1 Ba Zn1 97.828(8) 25_445 9_454 ? 
In1 Ba Zn1 82.172(8) 9_554 9_454 ? 
Zn1 Ba Zn1 97.828(8) 25 9_454 ? 
Zn1 Ba Zn1 82.172(8) 9_444 9_454 ? 
In1 Ba Zn1 82.172(8) 9_444 9_454 ? 
In1 Ba Zn1 97.828(8) 25 9_454 ? 
Zn1 Ba Zn1 43.31(2) 25_455 9_454 ? 
Zn1 Ba Zn1 180.000(18) 25_545 9_454 ? 
Zn1 Ba In1 82.172(8) 25_445 25_545 ? 
Zn1 Ba In1 97.828(8) 9_554 25_545 ? 
In1 Ba In1 82.172(8) 25_445 25_545 ? 
In1 Ba In1 97.828(8) 9_554 25_545 ? 
Zn1 Ba In1 82.172(8) 25 25_545 ? 
Zn1 Ba In1 97.828(8) 9_444 25_545 ? 
In1 Ba In1 97.828(8) 9_444 25_545 ? 
In1 Ba In1 82.172(8) 25 25_545 ? 
Zn1 Ba In1 136.69(2) 25_455 25_545 ? 
Zn1 Ba In1 0.000(18) 25_545 25_545 ? 
Zn1 Ba In1 180.000(18) 9_454 25_545 ? 
Zn1 In1 In1 0.0 17_556 17_556 ? 
Zn1 In1 In2 124.748(14) 17_556 17_566 ? 
In1 In1 In2 124.748(14) 17_556 17_566 ? 
Zn1 In1 In2 124.748(14) 17_556 9_545 ? 
In1 In1 In2 124.748(14) 17_556 9_545 ? 
In2 In1 In2 71.042(14) 17_566 9_545 ? 
Zn1 In1 In2 124.748(14) 17_556 17_556 ? 
In1 In1 In2 124.748(14) 17_556 17_556 ? 
In2 In1 In2 110.50(3) 17_566 17_556 ? 
In2 In1 In2 71.042(14) 9_545 17_556 ? 
Zn1 In1 In2 124.748(14) 17_556 9_445 ? 
In1 In1 In2 124.748(14) 17_556 9_445 ? 
In2 In1 In2 71.042(14) 17_566 9_445 ? 
In2 In1 In2 110.50(3) 9_545 9_445 ? 
In2 In1 In2 71.042(14) 17_556 9_445 ? 
Zn1 In1 Ba 68.343(12) 17_556 9_445 ? 
In1 In1 Ba 68.343(12) 17_556 9_445 ? 
In2 In1 Ba 138.620(6) 17_566 9_445 ? 
In2 In1 Ba 138.620(6) 9_545 9_445 ? 
In2 In1 Ba 70.753(13) 17_556 9_445 ? 
In2 In1 Ba 70.753(13) 9_445 9_445 ? 
Zn1 In1 Ba 68.343(12) 17_556 9 ? 
In1 In1 Ba 68.343(12) 17_556 9 ? 
In2 In1 Ba 70.753(13) 17_566 9 ? 
In2 In1 Ba 70.753(13) 9_545 9 ? 
In2 In1 Ba 138.620(6) 17_556 9 ? 
In2 In1 Ba 138.620(6) 9_445 9 ? 
Ba In1 Ba 136.69(2) 9_445 9 ? 
Zn1 In1 Ba 68.343(11) 17_556 9_455 ? 
In1 In1 Ba 68.343(11) 17_556 9_455 ? 
In2 In1 Ba 70.753(13) 17_566 9_455 ? 
In2 In1 Ba 138.620(6) 9_545 9_455 ? 
In2 In1 Ba 138.620(6) 17_556 9_455 ? 
In2 In1 Ba 70.753(13) 9_445 9_455 ? 
Ba In1 Ba 82.172(8) 9_445 9_455 ? 
Ba In1 Ba 82.172(8) 9 9_455 ? 
Zn1 In1 Ba 68.343(11) 17_556 9_545 ? 
In1 In1 Ba 68.343(11) 17_556 9_545 ? 
In2 In1 Ba 138.620(6) 17_566 9_545 ? 
In2 In1 Ba 70.753(13) 9_545 9_545 ? 
In2 In1 Ba 70.753(13) 17_556 9_545 ? 
In2 In1 Ba 138.620(6) 9_445 9_545 ? 
Ba In1 Ba 82.172(8) 9_445 9_545 ? 
Ba In1 Ba 82.172(8) 9 9_545 ? 
Ba In1 Ba 136.69(2) 9_455 9_545 ? 
Zn1 In2 Zn1 108.958(14) 17_566 9_454 ? 
Zn1 In2 In1 0.00(2) 17_566 17_566 ? 
Zn1 In2 In1 108.958(14) 9_454 17_566 ? 
Zn1 In2 In1 108.958(14) 17_566 9_454 ? 
Zn1 In2 In1 0.0 9_454 9_454 ? 
In1 In2 In1 108.958(14) 17_566 9_454 ? 
Zn1 In2 Zn1 110.50(3) 17_566 17_556 ? 
Zn1 In2 Zn1 108.958(14) 9_454 17_556 ? 
In1 In2 Zn1 110.50(3) 17_566 17_556 ? 
In1 In2 Zn1 108.958(14) 9_454 17_556 ? 
Zn1 In2 Zn1 108.958(14) 17_566 9_554 ? 
Zn1 In2 Zn1 110.50(3) 9_454 9_554 ? 
In1 In2 Zn1 108.958(14) 17_566 9_554 ? 
In1 In2 Zn1 110.50(3) 9_454 9_554 ? 
Zn1 In2 Zn1 108.958(14) 17_556 9_554 ? 
Zn1 In2 In1 108.958(14) 17_566 9_554 ? 
Zn1 In2 In1 110.50(3) 9_454 9_554 ? 
In1 In2 In1 108.958(14) 17_566 9_554 ? 
In1 In2 In1 110.50(3) 9_454 9_554 ? 
Zn1 In2 In1 108.958(14) 17_556 9_554 ? 
Zn1 In2 In1 0.00(2) 9_554 9_554 ? 
Zn1 In2 In1 110.50(3) 17_566 17_556 ? 
Zn1 In2 In1 108.958(14) 9_454 17_556 ? 
In1 In2 In1 110.50(3) 17_566 17_556 ? 
In1 In2 In1 108.958(14) 9_454 17_556 ? 
Zn1 In2 In1 0.0 17_556 17_556 ? 
Zn1 In2 In1 108.958(14) 9_554 17_556 ? 
In1 In2 In1 108.958(14) 9_554 17_556 ? 
Zn1 In2 Ba 163.291(10) 17_566 . ? 
Zn1 In2 Ba 63.526(13) 9_454 . ? 
In1 In2 Ba 163.291(10) 17_566 . ? 
In1 In2 Ba 63.526(13) 9_454 . ? 
Zn1 In2 Ba 86.21(2) 17_556 . ? 
Zn1 In2 Ba 63.526(13) 9_554 . ? 
In1 In2 Ba 63.526(13) 9_554 . ? 
In1 In2 Ba 86.21(2) 17_556 . ? 
Zn1 In2 Ba 63.526(13) 17_566 9 ? 
Zn1 In2 Ba 163.291(10) 9_454 9 ? 
In1 In2 Ba 63.526(13) 17_566 9 ? 
In1 In2 Ba 163.291(10) 9_454 9 ? 
Zn1 In2 Ba 63.526(13) 17_556 9 ? 
Zn1 In2 Ba 86.21(2) 9_554 9 ? 
In1 In2 Ba 86.21(2) 9_554 9 ? 
In1 In2 Ba 63.526(13) 17_556 9 ? 
Ba In2 Ba 127.716(13) . 9 ? 
Zn1 In2 Ba 86.21(2) 17_566 1_565 ? 
Zn1 In2 Ba 63.526(13) 9_454 1_565 ? 
In1 In2 Ba 86.21(2) 17_566 1_565 ? 
In1 In2 Ba 63.526(13) 9_454 1_565 ? 
Zn1 In2 Ba 163.291(10) 17_556 1_565 ? 
Zn1 In2 Ba 63.526(13) 9_554 1_565 ? 
In1 In2 Ba 63.526(13) 9_554 1_565 ? 
In1 In2 Ba 163.291(10) 17_556 1_565 ? 
Ba In2 Ba 77.09(2) . 1_565 ? 
Ba In2 Ba 127.716(13) 9 1_565 ? 
Zn1 In2 Ba 63.526(13) 17_566 9_455 ? 
Zn1 In2 Ba 86.21(2) 9_454 9_455 ? 
In1 In2 Ba 63.526(13) 17_566 9_455 ? 
In1 In2 Ba 86.21(2) 9_454 9_455 ? 
Zn1 In2 Ba 63.526(13) 17_556 9_455 ? 
Zn1 In2 Ba 163.291(10) 9_554 9_455 ? 
In1 In2 Ba 163.291(10) 9_554 9_455 ? 
In1 In2 Ba 63.526(13) 17_556 9_455 ? 
Ba In2 Ba 127.716(13) . 9_455 ? 
Ba In2 Ba 77.09(2) 9 9_455 ? 
Ba In2 Ba 127.716(13) 1_565 9_455 ? 
  
_diffrn_measured_fraction_theta_max    0.984 
_diffrn_reflns_theta_full              28.27 
_diffrn_measured_fraction_theta_full   0.984 
_refine_diff_density_max    0.767 
_refine_diff_density_min   -0.781 
_refine_diff_density_rms    0.210 
#===END
  
data_SrZn1.00In3.00 
  
_audit_creation_method            SHELXL-97 
_chemical_name_systematic 
; 
 ? 
; 
_chemical_name_common             ? 
_chemical_melting_point           ? 
_chemical_formula_moiety          ? 
_chemical_formula_sum 
 'In3 Sr Zn' 
_chemical_formula_weight          497.45 
  
loop_ 
 _atom_type_symbol 
 _atom_type_description 
 _atom_type_scat_dispersion_real 
 _atom_type_scat_dispersion_imag 
 _atom_type_scat_source 
 'Zn'  'Zn'   0.2839   1.4301 
 'International Tables Vol C Tables 4.2.6.8 and 6.1.1.4' 
 'Sr'  'Sr'  -1.5307   3.2498 
 'International Tables Vol C Tables 4.2.6.8 and 6.1.1.4' 
 'In'  'In'  -0.7276   1.3100 
 'International Tables Vol C Tables 4.2.6.8 and 6.1.1.4' 
  
_symmetry_cell_setting            Tetragonal 
_symmetry_space_group_name_H-M    I4/mmm 
  
loop_ 
 _symmetry_equiv_pos_as_xyz 
 'x, y, z' 
 '-x, -y, z' 
 '-y, x, z' 
 'y, -x, z' 
 '-x, y, -z' 
 'x, -y, -z' 
 'y, x, -z' 
 '-y, -x, -z' 
 'x+1/2, y+1/2, z+1/2' 
 '-x+1/2, -y+1/2, z+1/2' 
 '-y+1/2, x+1/2, z+1/2' 
 'y+1/2, -x+1/2, z+1/2' 
 '-x+1/2, y+1/2, -z+1/2' 
 'x+1/2, -y+1/2, -z+1/2' 
 'y+1/2, x+1/2, -z+1/2' 
 '-y+1/2, -x+1/2, -z+1/2' 
 '-x, -y, -z' 
 'x, y, -z' 
 'y, -x, -z' 
 '-y, x, -z' 
 'x, -y, z' 
 '-x, y, z' 
 '-y, -x, z' 
 'y, x, z' 
 '-x+1/2, -y+1/2, -z+1/2' 
 'x+1/2, y+1/2, -z+1/2' 
 'y+1/2, -x+1/2, -z+1/2' 
 '-y+1/2, x+1/2, -z+1/2' 
 'x+1/2, -y+1/2, z+1/2' 
 '-x+1/2, y+1/2, z+1/2' 
 '-y+1/2, -x+1/2, z+1/2' 
 'y+1/2, x+1/2, z+1/2' 
  
_cell_length_a                    4.6270(10) 
_cell_length_b                    4.6270(10) 
_cell_length_c                    12.098(5) 
_cell_angle_alpha                 90.00 
_cell_angle_beta                  90.00 
_cell_angle_gamma                 90.00 
_cell_volume                      259.01(14) 
_cell_formula_units_Z             2 
_cell_measurement_temperature     293(2) 
_cell_measurement_reflns_used     1325 
_cell_measurement_theta_min       3.37 
_cell_measurement_theta_max       28.22 
  
_exptl_crystal_description        irregular 
_exptl_crystal_colour             silver 
_exptl_crystal_size_max           0.17 
_exptl_crystal_size_mid           0.10 
_exptl_crystal_size_min           0.07 
_exptl_crystal_density_meas       'not measured' 
_exptl_crystal_density_diffrn     6.378 
_exptl_crystal_density_method     'not measured' 
_exptl_crystal_F_000              430 
_exptl_absorpt_coefficient_mu     27.760 
_exptl_absorpt_correction_type    empirical
_exptl_absorpt_correction_T_min   0.0845 
_exptl_absorpt_correction_T_max   0.1307 
_exptl_absorpt_process_details    ? 
  
_exptl_special_details 
; 
 ? 
; 
  
_diffrn_ambient_temperature       293(2) 
_diffrn_radiation_wavelength      0.71073 
_diffrn_radiation_type            MoK\a 
_diffrn_radiation_source          'fine-focus sealed tube' 
_diffrn_radiation_monochromator   graphite 
_diffrn_measurement_device_type   'CCD area detector' 
_diffrn_measurement_method        'phi and omega scans' 
_diffrn_detector_area_resol_mean  ? 
_diffrn_standards_number          ? 
_diffrn_standards_interval_count  ? 
_diffrn_standards_interval_time   ? 
_diffrn_standards_decay_%         ? 
_diffrn_reflns_number             1492 
_diffrn_reflns_av_R_equivalents   0.1197 
_diffrn_reflns_av_sigmaI/netI     0.0433 
_diffrn_reflns_limit_h_min        -6 
_diffrn_reflns_limit_h_max        6 
_diffrn_reflns_limit_k_min        -6 
_diffrn_reflns_limit_k_max        6 
_diffrn_reflns_limit_l_min        -15 
_diffrn_reflns_limit_l_max        15 
_diffrn_reflns_theta_min          3.37 
_diffrn_reflns_theta_max          28.22 
_reflns_number_total              119 
_reflns_number_gt                 119 
_reflns_threshold_expression      >2sigma(I) 
  
_computing_data_collection        'Bruker SMART' 
_computing_cell_refinement        'Bruker SMART' 
_computing_data_reduction         'Bruker SAINT' 
_computing_structure_solution     'SHELXS-97 (Sheldrick, 1990)' 
_computing_structure_refinement   'SHELXL-97 (Sheldrick, 1997)' 
_computing_molecular_graphics     'Bruker SHELXTL' 
_computing_publication_material   'Bruker SHELXTL' 
  
_refine_special_details 
; 
 Refinement of F^2^ against ALL reflections.  The weighted R-factor wR and 
 goodness of fit S are based on F^2^, conventional R-factors R are based 
 on F, with F set to zero for negative F^2^. The threshold expression of 
 F^2^ > 2sigma(F^2^) is used only for calculating R-factors(gt) etc. and is 
 not relevant to the choice of reflections for refinement.  R-factors based 
 on F^2^ are statistically about twice as large as those based on F, and R- 
 factors based on ALL data will be even larger. 
; 
  
_refine_ls_structure_factor_coef  Fsqd 
_refine_ls_matrix_type            full 
_refine_ls_weighting_scheme       calc 
_refine_ls_weighting_details 
 'calc w=1/[\s^2^(Fo^2^)+(0.0000P)^2^+16.2947P] where P=(Fo^2^+2Fc^2^)/3' 
_atom_sites_solution_primary      direct 
_atom_sites_solution_secondary    difmap 
_atom_sites_solution_hydrogens    '.' 
_refine_ls_hydrogen_treatment     '.' 
_refine_ls_extinction_method      SHELXL 
_refine_ls_extinction_coef        0.017(2) 
_refine_ls_extinction_expression 
 'Fc^*^=kFc[1+0.001xFc^2^\l^3^/sin(2\q)]^-1/4^' 
_refine_ls_number_reflns          119 
_refine_ls_number_parameters      10 
_refine_ls_number_restraints      0 
_refine_ls_R_factor_all           0.0228 
_refine_ls_R_factor_gt            0.0228 
_refine_ls_wR_factor_ref          0.0678 
_refine_ls_wR_factor_gt           0.0678 
_refine_ls_goodness_of_fit_ref    1.016 
_refine_ls_restrained_S_all       1.016 
_refine_ls_shift/su_max           0.000 
_refine_ls_shift/su_mean          0.000 
  
loop_ 
 _atom_site_label 
 _atom_site_type_symbol 
 _atom_site_fract_x 
 _atom_site_fract_y 
 _atom_site_fract_z 
 _atom_site_U_iso_or_equiv 
 _atom_site_adp_type 
 _atom_site_occupancy 
 _atom_site_symmetry_multiplicity 
 _atom_site_calc_flag 
 _atom_site_refinement_flags 
 _atom_site_disorder_assembly 
 _atom_site_disorder_group 
Sr Sr 0.0000 0.0000 0.0000 0.0138(7) Uani 1 16 d S . . 
In1 In 0.0000 0.0000 0.60720(14) 0.0139(7) Uani 0.50(2) 8 d SP . . 
Zn1 Zn 0.0000 0.0000 0.60720(14) 0.0139(7) Uani 0.50(2) 8 d SP . . 
In2 In 0.0000 0.5000 0.2500 0.0161(5) Uani 1 8 d S . . 
  
loop_ 
 _atom_site_aniso_label 
 _atom_site_aniso_U_11 
 _atom_site_aniso_U_22 
 _atom_site_aniso_U_33 
 _atom_site_aniso_U_23 
 _atom_site_aniso_U_13 
 _atom_site_aniso_U_12 
Sr 0.0127(8) 0.0127(8) 0.0159(12) 0.000 0.000 0.000 
In1 0.0149(7) 0.0149(7) 0.0117(8) 0.000 0.000 0.000 
Zn1 0.0149(7) 0.0149(7) 0.0117(8) 0.000 0.000 0.000 
In2 0.0137(6) 0.0137(6) 0.0210(7) 0.000 0.000 0.000 
  
_geom_special_details 
; 
 All esds (except the esd in the dihedral angle between two l.s. planes) 
 are estimated using the full covariance matrix.  The cell esds are taken 
 into account individually in the estimation of esds in distances, angles 
 and torsion angles; correlations between esds in cell parameters are only 
 used when they are defined by crystal symmetry.  An approximate (isotropic) 
 treatment of cell esds is used for estimating esds involving l.s. planes. 
; 
  
loop_ 
 _geom_bond_atom_site_label_1 
 _geom_bond_atom_site_label_2 
 _geom_bond_distance 
 _geom_bond_site_symmetry_2 
 _geom_bond_publ_flag 
Sr Zn1 3.5195(9) 25_445 ? 
Sr Zn1 3.5195(9) 9_554 ? 
Sr In1 3.5195(9) 25_445 ? 
Sr In1 3.5195(9) 9_554 ? 
Sr Zn1 3.5195(9) 25 ? 
Sr Zn1 3.5195(9) 9_444 ? 
Sr In1 3.5195(9) 9_444 ? 
Sr In1 3.5195(9) 25 ? 
Sr Zn1 3.5195(9) 25_455 ? 
Sr Zn1 3.5195(9) 25_545 ? 
Sr Zn1 3.5195(9) 9_454 ? 
Sr In1 3.5195(9) 25_545 ? 
In1 Zn1 2.594(4) 17_556 ? 
In1 In1 2.594(4) 17_556 ? 
In1 In2 2.8873(12) 17_566 ? 
In1 In2 2.8873(12) 9_545 ? 
In1 In2 2.8873(12) 17_556 ? 
In1 In2 2.8873(12) 9_445 ? 
In1 Sr 3.5195(9) 9_445 ? 
In1 Sr 3.5195(9) 9 ? 
In1 Sr 3.5195(9) 9_455 ? 
In1 Sr 3.5195(9) 9_545 ? 
In2 Zn1 2.8873(12) 17_566 ? 
In2 Zn1 2.8873(12) 9_454 ? 
In2 In1 2.8873(12) 17_566 ? 
In2 In1 2.8873(12) 9_454 ? 
In2 Zn1 2.8873(12) 17_556 ? 
In2 Zn1 2.8873(12) 9_554 ? 
In2 In1 2.8873(12) 9_554 ? 
In2 In1 2.8873(12) 17_556 ? 
In2 In2 3.2718(7) 25_565 ? 
In2 In2 3.2718(7) 25_455 ? 
In2 In2 3.2718(7) 25_465 ? 
In2 In2 3.2718(7) 25 ? 
  
loop_ 
 _geom_angle_atom_site_label_1 
 _geom_angle_atom_site_label_2 
 _geom_angle_atom_site_label_3 
 _geom_angle 
 _geom_angle_site_symmetry_1 
 _geom_angle_site_symmetry_3 
 _geom_angle_publ_flag 
Zn1 Sr Zn1 180.00(5) 25_445 9_554 ? 
Zn1 Sr In1 0.00(5) 25_445 25_445 ? 
Zn1 Sr In1 180.00(5) 9_554 25_445 ? 
Zn1 Sr In1 180.00(5) 25_445 9_554 ? 
Zn1 Sr In1 0.00(5) 9_554 9_554 ? 
In1 Sr In1 180.00(5) 25_445 9_554 ? 
Zn1 Sr Zn1 136.75(6) 25_445 25 ? 
Zn1 Sr Zn1 43.25(6) 9_554 25 ? 
In1 Sr Zn1 136.75(6) 25_445 25 ? 
In1 Sr Zn1 43.25(6) 9_554 25 ? 
Zn1 Sr Zn1 43.25(6) 25_445 9_444 ? 
Zn1 Sr Zn1 136.75(6) 9_554 9_444 ? 
In1 Sr Zn1 43.25(6) 25_445 9_444 ? 
In1 Sr Zn1 136.75(6) 9_554 9_444 ? 
Zn1 Sr Zn1 180.00(5) 25 9_444 ? 
Zn1 Sr In1 43.25(6) 25_445 9_444 ? 
Zn1 Sr In1 136.75(6) 9_554 9_444 ? 
In1 Sr In1 43.25(6) 25_445 9_444 ? 
In1 Sr In1 136.75(6) 9_554 9_444 ? 
Zn1 Sr In1 180.00(5) 25 9_444 ? 
Zn1 Sr In1 0.00(5) 9_444 9_444 ? 
Zn1 Sr In1 136.75(6) 25_445 25 ? 
Zn1 Sr In1 43.25(6) 9_554 25 ? 
In1 Sr In1 136.75(6) 25_445 25 ? 
In1 Sr In1 43.25(6) 9_554 25 ? 
Zn1 Sr In1 0.00(5) 25 25 ? 
Zn1 Sr In1 180.00(5) 9_444 25 ? 
In1 Sr In1 180.00(5) 9_444 25 ? 
Zn1 Sr Zn1 82.195(19) 25_445 25_455 ? 
Zn1 Sr Zn1 97.805(19) 9_554 25_455 ? 
In1 Sr Zn1 82.195(19) 25_445 25_455 ? 
In1 Sr Zn1 97.805(19) 9_554 25_455 ? 
Zn1 Sr Zn1 82.195(19) 25 25_455 ? 
Zn1 Sr Zn1 97.805(19) 9_444 25_455 ? 
In1 Sr Zn1 97.805(19) 9_444 25_455 ? 
In1 Sr Zn1 82.195(19) 25 25_455 ? 
Zn1 Sr Zn1 82.195(19) 25_445 25_545 ? 
Zn1 Sr Zn1 97.805(19) 9_554 25_545 ? 
In1 Sr Zn1 82.195(19) 25_445 25_545 ? 
In1 Sr Zn1 97.805(19) 9_554 25_545 ? 
Zn1 Sr Zn1 82.195(19) 25 25_545 ? 
Zn1 Sr Zn1 97.805(19) 9_444 25_545 ? 
In1 Sr Zn1 97.805(19) 9_444 25_545 ? 
In1 Sr Zn1 82.195(19) 25 25_545 ? 
Zn1 Sr Zn1 136.75(6) 25_455 25_545 ? 
Zn1 Sr Zn1 97.805(19) 25_445 9_454 ? 
Zn1 Sr Zn1 82.195(19) 9_554 9_454 ? 
In1 Sr Zn1 97.805(19) 25_445 9_454 ? 
In1 Sr Zn1 82.195(19) 9_554 9_454 ? 
Zn1 Sr Zn1 97.805(19) 25 9_454 ? 
Zn1 Sr Zn1 82.195(19) 9_444 9_454 ? 
In1 Sr Zn1 82.195(19) 9_444 9_454 ? 
In1 Sr Zn1 97.805(19) 25 9_454 ? 
Zn1 Sr Zn1 43.25(6) 25_455 9_454 ? 
Zn1 Sr Zn1 180.00(5) 25_545 9_454 ? 
Zn1 Sr In1 82.195(19) 25_445 25_545 ? 
Zn1 Sr In1 97.805(19) 9_554 25_545 ? 
In1 Sr In1 82.195(19) 25_445 25_545 ? 
In1 Sr In1 97.805(19) 9_554 25_545 ? 
Zn1 Sr In1 82.195(19) 25 25_545 ? 
Zn1 Sr In1 97.805(19) 9_444 25_545 ? 
In1 Sr In1 97.805(19) 9_444 25_545 ? 
In1 Sr In1 82.195(19) 25 25_545 ? 
Zn1 Sr In1 136.75(6) 25_455 25_545 ? 
Zn1 Sr In1 0.00(5) 25_545 25_545 ? 
Zn1 Sr In1 180.00(5) 9_454 25_545 ? 
Zn1 In1 In1 0.0 17_556 17_556 ? 
Zn1 In1 In2 126.75(3) 17_556 17_566 ? 
In1 In1 In2 126.75(3) 17_556 17_566 ? 
Zn1 In1 In2 126.75(3) 17_556 9_545 ? 
In1 In1 In2 126.75(3) 17_556 9_545 ? 
In2 In1 In2 69.02(3) 17_566 9_545 ? 
Zn1 In1 In2 126.75(3) 17_556 17_556 ? 
In1 In1 In2 126.75(3) 17_556 17_556 ? 
In2 In1 In2 106.50(6) 17_566 17_556 ? 
In2 In1 In2 69.02(3) 9_545 17_556 ? 
Zn1 In1 In2 126.75(3) 17_556 9_445 ? 
In1 In1 In2 126.75(3) 17_556 9_445 ? 
In2 In1 In2 69.02(3) 17_566 9_445 ? 
In2 In1 In2 106.50(6) 9_545 9_445 ? 
In2 In1 In2 69.02(3) 17_556 9_445 ? 
Zn1 In1 Sr 68.38(3) 17_556 9_445 ? 
In1 In1 Sr 68.38(3) 17_556 9_445 ? 
In2 In1 Sr 138.347(18) 17_566 9_445 ? 
In2 In1 Sr 138.347(18) 9_545 9_445 ? 
In2 In1 Sr 72.169(18) 17_556 9_445 ? 
In2 In1 Sr 72.169(18) 9_445 9_445 ? 
Zn1 In1 Sr 68.38(3) 17_556 9 ? 
In1 In1 Sr 68.38(3) 17_556 9 ? 
In2 In1 Sr 72.169(18) 17_566 9 ? 
In2 In1 Sr 72.169(18) 9_545 9 ? 
In2 In1 Sr 138.347(18) 17_556 9 ? 
In2 In1 Sr 138.347(18) 9_445 9 ? 
Sr In1 Sr 136.75(6) 9_445 9 ? 
Zn1 In1 Sr 68.38(3) 17_556 9_455 ? 
In1 In1 Sr 68.38(3) 17_556 9_455 ? 
In2 In1 Sr 72.169(18) 17_566 9_455 ? 
In2 In1 Sr 138.347(18) 9_545 9_455 ? 
In2 In1 Sr 138.347(18) 17_556 9_455 ? 
In2 In1 Sr 72.169(18) 9_445 9_455 ? 
Sr In1 Sr 82.195(19) 9_445 9_455 ? 
Sr In1 Sr 82.195(19) 9 9_455 ? 
Zn1 In1 Sr 68.38(3) 17_556 9_545 ? 
In1 In1 Sr 68.38(3) 17_556 9_545 ? 
In2 In1 Sr 138.347(18) 17_566 9_545 ? 
In2 In1 Sr 72.169(18) 9_545 9_545 ? 
In2 In1 Sr 72.169(18) 17_556 9_545 ? 
In2 In1 Sr 138.347(18) 9_445 9_545 ? 
Sr In1 Sr 82.195(19) 9_445 9_545 ? 
Sr In1 Sr 82.195(19) 9 9_545 ? 
Sr In1 Sr 136.75(6) 9_455 9_545 ? 
Zn1 In2 Zn1 110.98(3) 17_566 9_454 ? 
Zn1 In2 In1 0.00(5) 17_566 17_566 ? 
Zn1 In2 In1 110.98(3) 9_454 17_566 ? 
Zn1 In2 In1 110.98(3) 17_566 9_454 ? 
Zn1 In2 In1 0.0 9_454 9_454 ? 
In1 In2 In1 110.98(3) 17_566 9_454 ? 
Zn1 In2 Zn1 106.50(6) 17_566 17_556 ? 
Zn1 In2 Zn1 110.98(3) 9_454 17_556 ? 
In1 In2 Zn1 106.50(6) 17_566 17_556 ? 
In1 In2 Zn1 110.98(3) 9_454 17_556 ? 
Zn1 In2 Zn1 110.98(3) 17_566 9_554 ? 
Zn1 In2 Zn1 106.50(6) 9_454 9_554 ? 
In1 In2 Zn1 110.98(3) 17_566 9_554 ? 
In1 In2 Zn1 106.50(6) 9_454 9_554 ? 
Zn1 In2 Zn1 110.98(3) 17_556 9_554 ? 
Zn1 In2 In1 110.98(3) 17_566 9_554 ? 
Zn1 In2 In1 106.50(6) 9_454 9_554 ? 
In1 In2 In1 110.98(3) 17_566 9_554 ? 
In1 In2 In1 106.50(6) 9_454 9_554 ? 
Zn1 In2 In1 110.98(3) 17_556 9_554 ? 
Zn1 In2 In1 0.00(5) 9_554 9_554 ? 
Zn1 In2 In1 106.50(6) 17_566 17_556 ? 
Zn1 In2 In1 110.98(3) 9_454 17_556 ? 
In1 In2 In1 106.50(6) 17_566 17_556 ? 
In1 In2 In1 110.98(3) 9_454 17_556 ? 
Zn1 In2 In1 0.0 17_556 17_556 ? 
Zn1 In2 In1 110.98(3) 9_554 17_556 ? 
In1 In2 In1 110.98(3) 9_554 17_556 ? 
Zn1 In2 In2 55.488(16) 17_566 25_565 ? 
Zn1 In2 In2 124.512(16) 9_454 25_565 ? 
In1 In2 In2 55.488(16) 17_566 25_565 ? 
In1 In2 In2 124.512(16) 9_454 25_565 ? 
Zn1 In2 In2 124.512(16) 17_556 25_565 ? 
Zn1 In2 In2 55.488(16) 9_554 25_565 ? 
In1 In2 In2 55.488(16) 9_554 25_565 ? 
In1 In2 In2 124.512(16) 17_556 25_565 ? 
Zn1 In2 In2 124.512(16) 17_566 25_455 ? 
Zn1 In2 In2 55.488(16) 9_454 25_455 ? 
In1 In2 In2 124.512(16) 17_566 25_455 ? 
In1 In2 In2 55.488(16) 9_454 25_455 ? 
Zn1 In2 In2 55.488(16) 17_556 25_455 ? 
Zn1 In2 In2 124.512(16) 9_554 25_455 ? 
In1 In2 In2 124.512(16) 9_554 25_455 ? 
In1 In2 In2 55.488(16) 17_556 25_455 ? 
In2 In2 In2 180.0 25_565 25_455 ? 
Zn1 In2 In2 55.488(16) 17_566 25_465 ? 
Zn1 In2 In2 55.488(16) 9_454 25_465 ? 
In1 In2 In2 55.488(16) 17_566 25_465 ? 
In1 In2 In2 55.488(16) 9_454 25_465 ? 
Zn1 In2 In2 124.512(16) 17_556 25_465 ? 
Zn1 In2 In2 124.512(16) 9_554 25_465 ? 
In1 In2 In2 124.512(16) 9_554 25_465 ? 
In1 In2 In2 124.512(16) 17_556 25_465 ? 
In2 In2 In2 90.0 25_565 25_465 ? 
In2 In2 In2 90.0 25_455 25_465 ? 
Zn1 In2 In2 124.512(16) 17_566 25 ? 
Zn1 In2 In2 124.512(16) 9_454 25 ? 
In1 In2 In2 124.512(16) 17_566 25 ? 
In1 In2 In2 124.512(16) 9_454 25 ? 
Zn1 In2 In2 55.488(16) 17_556 25 ? 
Zn1 In2 In2 55.488(16) 9_554 25 ? 
In1 In2 In2 55.488(16) 9_554 25 ? 
In1 In2 In2 55.488(16) 17_556 25 ? 
In2 In2 In2 90.0 25_565 25 ? 
In2 In2 In2 90.0 25_455 25 ? 
In2 In2 In2 180.0 25_465 25 ? 
  
_diffrn_measured_fraction_theta_max    0.967 
_diffrn_reflns_theta_full              28.22 
_diffrn_measured_fraction_theta_full   0.967 
_refine_diff_density_max    0.813 
_refine_diff_density_min   -1.529 
_refine_diff_density_rms    0.250 
